# Supplementary material
Source: PubMed Central journal article supplement (PMC5269645)

## Contribution of shape and charge to the inhibition of a family GH99 endo- $\alpha$ -1,2-mannanase

Marija Petricevic,<sup>†</sup> Lukasz F. Sobala,<sup>‡</sup> Pearl Fernandes,<sup>†</sup> Lluís Raich,<sup>||</sup> Andrew J Thompson,<sup>‡</sup> Ganeko Bernardo-Seisdedos,<sup>§</sup> Oscar Millet,<sup>§</sup> Sha Zhu,<sup>#</sup> Matthieu Sollogoub,<sup>#</sup> Jesús Jiménez-Barbero,<sup>§#</sup> Carme Rovira,<sup>||</sup> Gideon J. Davies<sup>‡\*</sup>, Spencer J. Williams<sup>†\*</sup>

### Contents

|                                                                                                                                                                                              |     |
|----------------------------------------------------------------------------------------------------------------------------------------------------------------------------------------------|-----|
| Figure S1. NMR titration curves for binding of ManddMan and ManGlucal to <sup>15</sup> N-labelled BtGH99 and BxGH99. ....                                                                    | S3  |
| Figure S2. 2D SOFAST-HMQC spectra for binding of ManGlucal to <sup>15</sup> N-labelled BtGH99 and BxGH99. ....                                                                               | S4  |
| Figure S3. Raw NMR spectra for titration curves reported in Figure S1 for binding of binding of ManddMan and ManGlucal to <sup>15</sup> N-labelled BtGH99 and BxGH99. ....                   | S5  |
| Figure S4. Isothermal titration calorimetry of ManNOE binding to BtGH99 and BxGH99. ....                                                                                                     | S6  |
| Figure S5. Conformational free-energy landscape for protonated NOE. ....                                                                                                                     | S7  |
| Figure S6. Error surfaces for all inhibitors. ....                                                                                                                                           | S8  |
| Table S1. Data collection and refinement statistics for BxGH99 complexes. ....                                                                                                               | S9  |
| Protein expression, purification, and crystallization. ....                                                                                                                                  | S10 |
| Synthetic chemistry. ....                                                                                                                                                                    | S11 |
| 2,3,4,6-Tetra- <i>O</i> -acetyl- $\alpha$ -D-mannopyranosyl-(1 $\rightarrow$ 3)-1,2,4,6-tetra- <i>O</i> -acetyl- $\alpha,\beta$ -D-mannopyranose (11)                                        | S11 |
| (2,3,4,6-Tetra- <i>O</i> -acetyl- $\alpha$ -D-mannopyranosyl)-(1 $\rightarrow$ 3)-(2,4,6-tri- <i>O</i> -acetyl- $\alpha$ -D-mannopyranosyl) bromide (12). ....                               | S11 |
| 2,3,4,6-Tetra- <i>O</i> -acetyl- $\alpha$ -D-mannopyranosyl-(1 $\rightarrow$ 3)-4,6-di- <i>O</i> -acetyl-1,5-anhydro-2-deoxy-D- <i>arabino</i> -hex-1-enitol (13) ....                       | S11 |
| 2,3,4,6-Tetra- <i>O</i> -acetyl- $\alpha$ -D-mannopyranosyl-(1 $\rightarrow$ 3)-(4,6-di- <i>O</i> -acetyl-1,2-dideoxy-D-mannopyranose (14) ....                                              | S12 |
| $\alpha$ -D-Mannopyranosyl-(1 $\rightarrow$ 3)-1,2-dideoxy-D-mannopyranose (ManddMan; 5). ....                                                                                               | S12 |
| $\alpha$ -D-Mannopyranosyl-(1 $\rightarrow$ 3)-1,5-anhydro-2-deoxy-D- <i>arabino</i> -hex-1-enitol (ManGlucal; 7) ....                                                                       | S12 |
| Benzyl 2- <i>O</i> -(2- <i>O</i> -acetyl-3,4,5-tri- <i>O</i> -benzyl- $\alpha$ -mannopyranosyl)-(1 $\rightarrow$ 2)-(4-cyano-4-deoxy- $\beta$ -D-arabinopyranoside) (17) ....                | S12 |
| Benzyl 2- <i>O</i> -(2- <i>O</i> -acetyl-3,4,5-tri- <i>O</i> -benzyl- $\alpha$ -mannopyranosyl)-(1 $\rightarrow$ 2)-(3- <i>O</i> -acetyl-4-cyano-4-deoxy- $\beta$ -D-arabinopyranoside) .... | S13 |
| Benzyl 2- <i>O</i> -(3,4,5-tri- <i>O</i> -benzyl- $\alpha$ -mannopyranosyl)-(1 $\rightarrow$ 2)-(4-cyano-4-deoxy- $\beta$ -D-arabinopyranoside) (18) ....                                    | S13 |

|                                                                                                                                                                                                                                |     |
|--------------------------------------------------------------------------------------------------------------------------------------------------------------------------------------------------------------------------------|-----|
| Benzyl 2- <i>O</i> -(2- <i>O</i> -acetyl-2,4,5-tri- <i>O</i> -benzyl- $\alpha$ -mannopyranosyl)-(1 $\rightarrow$ 2)-(4- <i>C</i> -[( <i>tert</i> -butoxycarbonyl)amino]methyl-4-deoxy- $\beta$ -D-arabinopyranoside) (19)..... | S13 |
| $\alpha$ -D-Mannopyranosyl-(1 $\rightarrow$ 3)-noeuromycin hydrochloride (ManNOE.HCl; 9).....                                                                                                                                  | S14 |
| References.....                                                                                                                                                                                                                | S14 |
| $^1\text{H}$ and $^{13}\text{C}$ NMR spectra.....                                                                                                                                                                              | S15 |
| (2,3,4,6-Tetra- <i>O</i> -acetyl- $\alpha$ -D-mannopyranosyl)-(1 $\rightarrow$ 3)-(2,4,6-tri- <i>O</i> -acetyl- $\alpha$ -D-mannopyranosyl) bromide (12).....                                                                  | S15 |
| 2,3,4,6-Tetra- <i>O</i> -acetyl- $\alpha$ -D-mannopyranosyl-(1 $\rightarrow$ 3)-4,6-di- <i>O</i> -acetyl-1,5-anhydro-2-deoxy-D- <i>arabino</i> -hex-1-enitol (13).....                                                         | S16 |
| 2,3,4,6-Tetra- <i>O</i> -acetyl- $\alpha$ -D-mannopyranosyl-(1 $\rightarrow$ 3)-(4,6-di- <i>O</i> -acetyl-1,2-dideoxy-D-mannopyranose (14).....                                                                                | S17 |
| $\alpha$ -D-Mannopyranosyl-(1 $\rightarrow$ 3)-1,2-dideoxy-D-mannopyranose (ManddMan; 5).....                                                                                                                                  | S18 |
| $\alpha$ -D-Mannopyranosyl-(1 $\rightarrow$ 3)-1,5-anhydro-2-deoxy-D- <i>arabino</i> -hex-1-enitol (ManGlucal; 7).....                                                                                                         | S19 |
| Benzyl 2- <i>O</i> -(2- <i>O</i> -acetyl-3,4,5-tri- <i>O</i> -benzyl- $\alpha$ -mannopyranosyl)-(1 $\rightarrow$ 2)-(4-cyano-4-deoxy- $\beta$ -D-arabinopyranoside) (17).....                                                  | S20 |
| Benzyl 2- <i>O</i> -(2- <i>O</i> -acetyl-3,4,5-tri- <i>O</i> -benzyl- $\alpha$ -mannopyranosyl)-(1 $\rightarrow$ 2)-(3- <i>O</i> -acetyl-4-cyano-4-deoxy- $\beta$ -D-arabinopyranoside).....                                   | S21 |
| Benzyl 2- <i>O</i> -(3,4,5-tri- <i>O</i> -benzyl- $\alpha$ -mannopyranosyl)-(1 $\rightarrow$ 2)-(4-cyano-4-deoxy- $\beta$ -D-arabinopyranoside) (18).....                                                                      | S22 |
| Benzyl 2- <i>O</i> -(2- <i>O</i> -acetyl-2,4,5-tri- <i>O</i> -benzyl- $\alpha$ -mannopyranosyl)-(1 $\rightarrow$ 2)-(4- <i>C</i> -[( <i>tert</i> -butoxycarbonyl)amino]methyl-4-deoxy- $\beta$ -D-arabinopyranoside) (19)..... | S23 |
| $\alpha$ -D-Mannopyranosyl-(1 $\rightarrow$ 3)-noeuromycin hydrochloride (ManNOE.HCl; 9).....                                                                                                                                  | S24 |

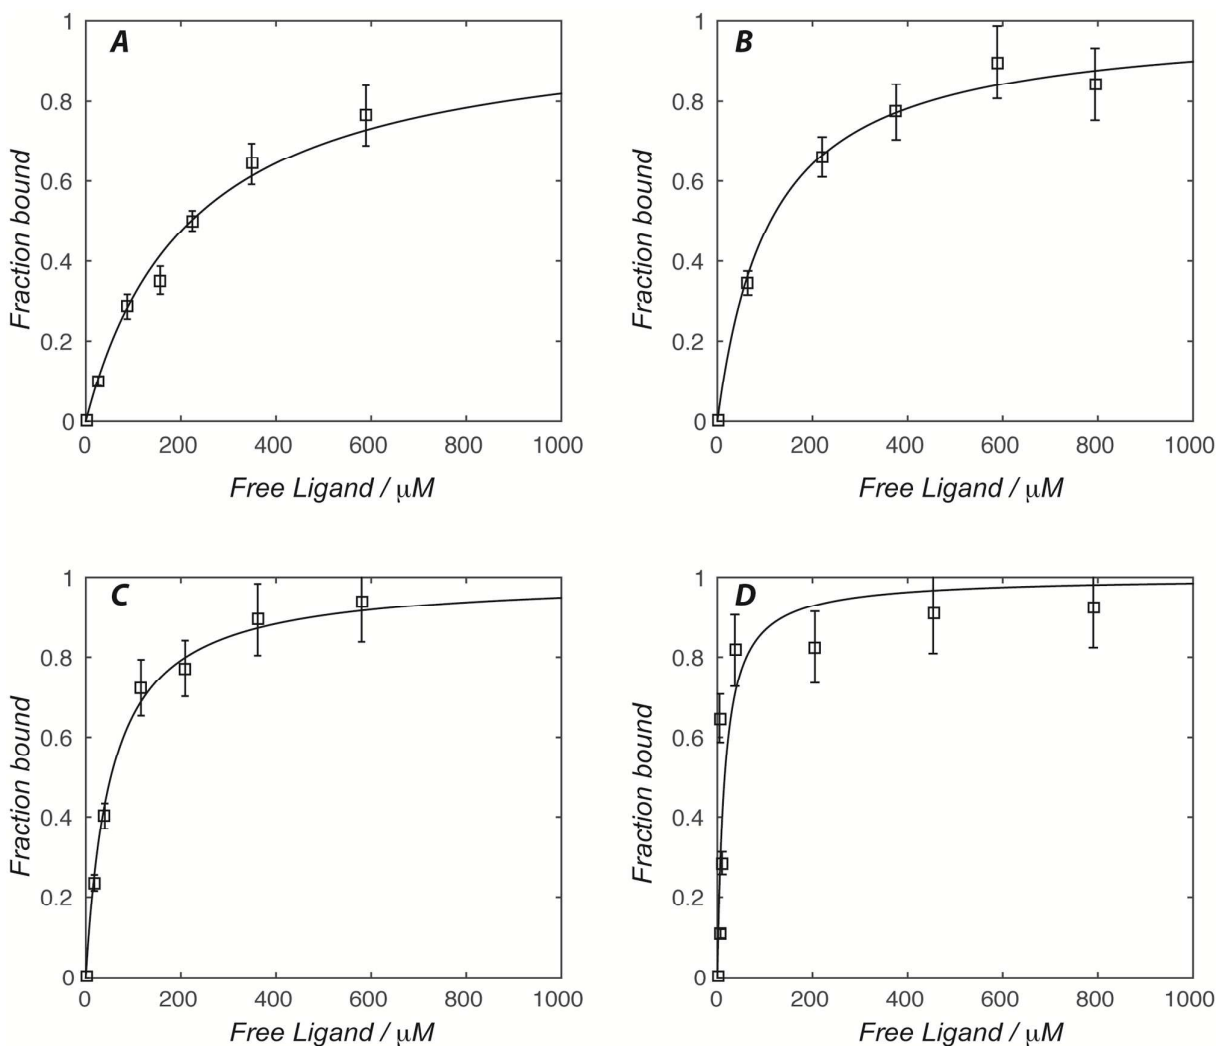

**Figure S1. NMR titration curves for binding of ManddMan and ManGlucal to  $^{15}\text{N}$ -labelled *BtGH99* and *BxGH99*.**

Binding of (A) ManddMan to *BxGH99*, (B) ManGlucal to *BxGH99*, (C) ManddMan to *BtGH99*, and (D) ManGlucal to *BtGH99*.  $\text{N}\epsilon\text{-H}\epsilon$  of R295 (*BxGH99*) and R291 (*BtGH99*) were used as binding reporters. Duplicate experimental points at three different ligand concentrations were used for error-bar estimation.

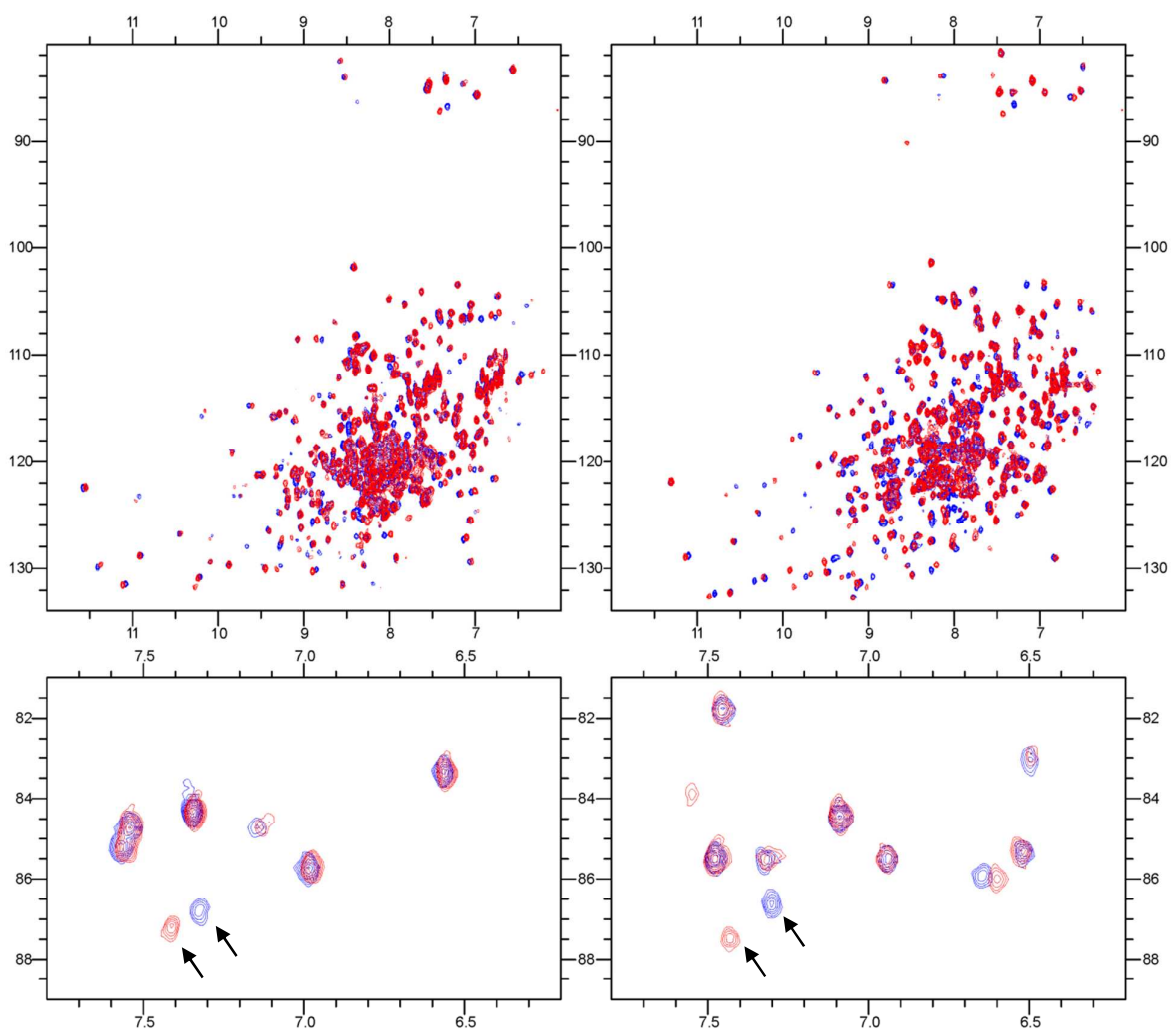

**Figure S2. 2D SOFAST-HMQC spectra for binding of ManGlucal to  $^{15}\text{N}$ -labelled *Bt*GH99 and *Bx*GH99.**

2D SOFAST-HMQC NMR spectra of  $^{15}\text{N}$ -labelled *Bt*GH99 (left) or *Bx*GH99 (right) in the absence (blue) or presence of an excess of ManGlucal (7; red). The arrows highlight the chemical shift perturbation observed for the signal corresponding to  $\text{N}\epsilon\text{-H}\epsilon$  of R291 (*Bt*GH99) and R295 (*Bx*GH99).

### SUPPORTING INFORMATION

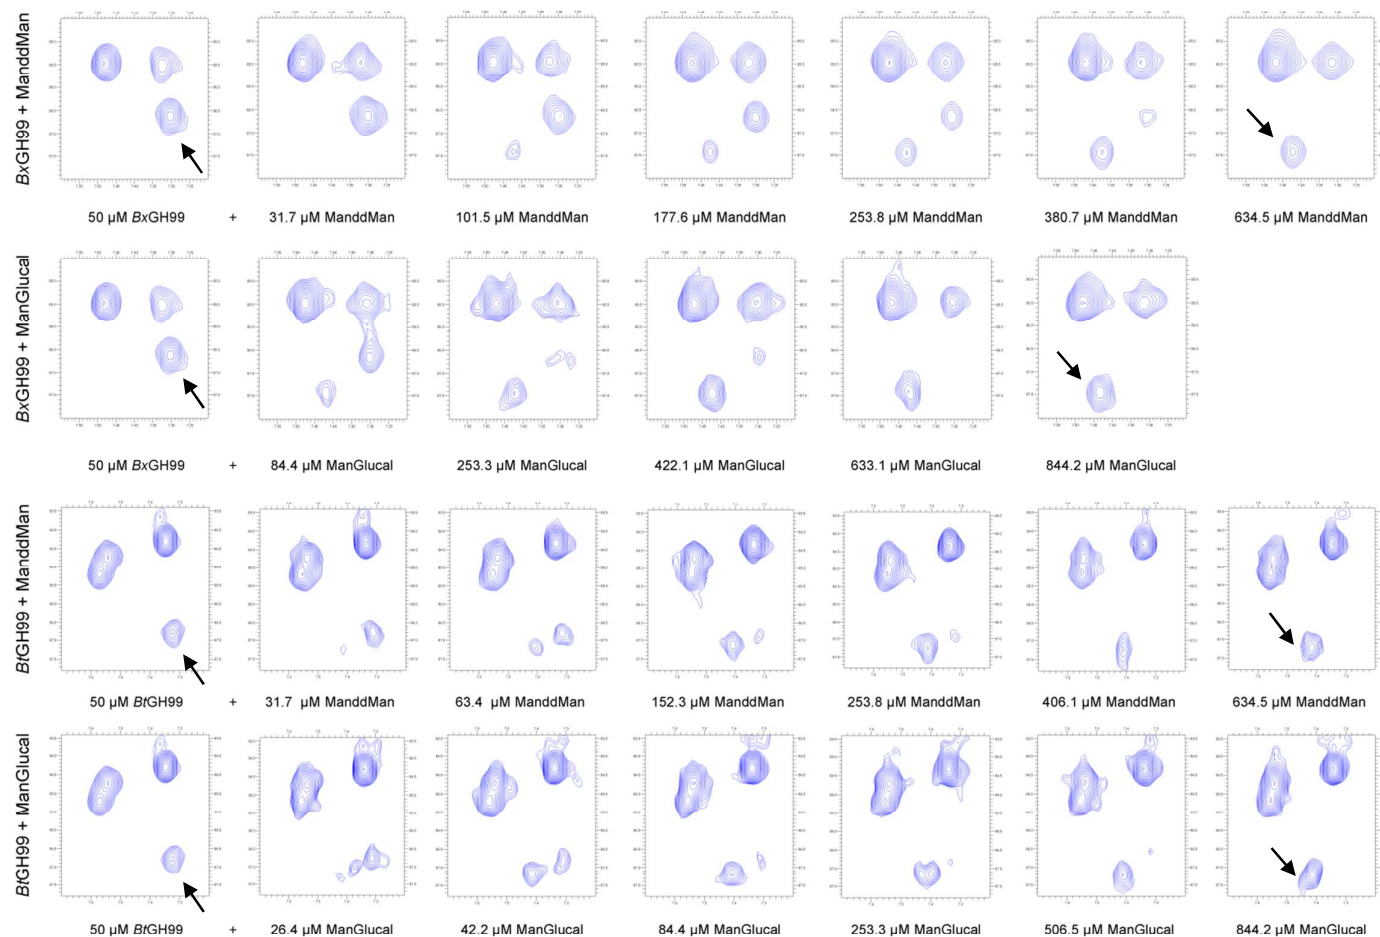

**Figure S3. Raw NMR spectra for titration curves reported in Figure S1 for binding of binding of ManddMan and ManGlucal to  $^{15}\text{N}$ -labelled *BtGH99* and *BxGH99*.**

$\text{N}\epsilon\text{-H}\epsilon$  of R295 (*BxGH99*) and R291 (*BtGH99*) were used as binding reporters. Arrows denote the signals used for monitoring the titration.

SUPPORTING INFORMATION

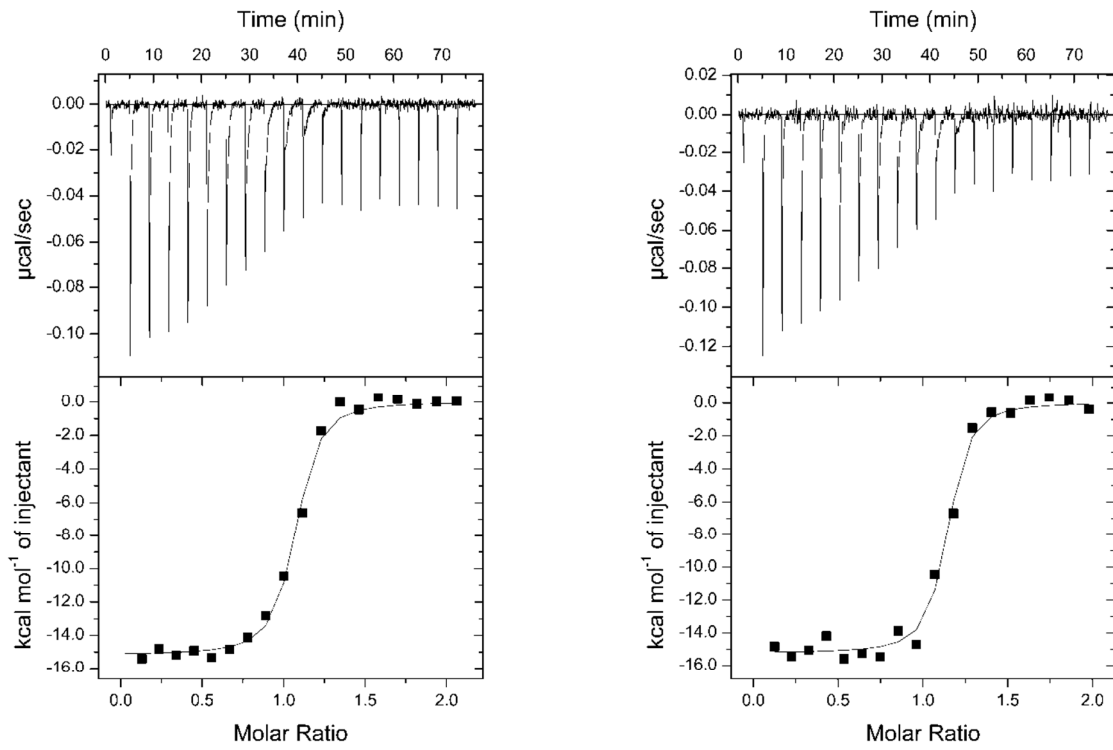

**Figure S4.** Isothermal titration calorimetry of ManNOE binding to (left) *BtGH99* and (right) *BxGH99*.

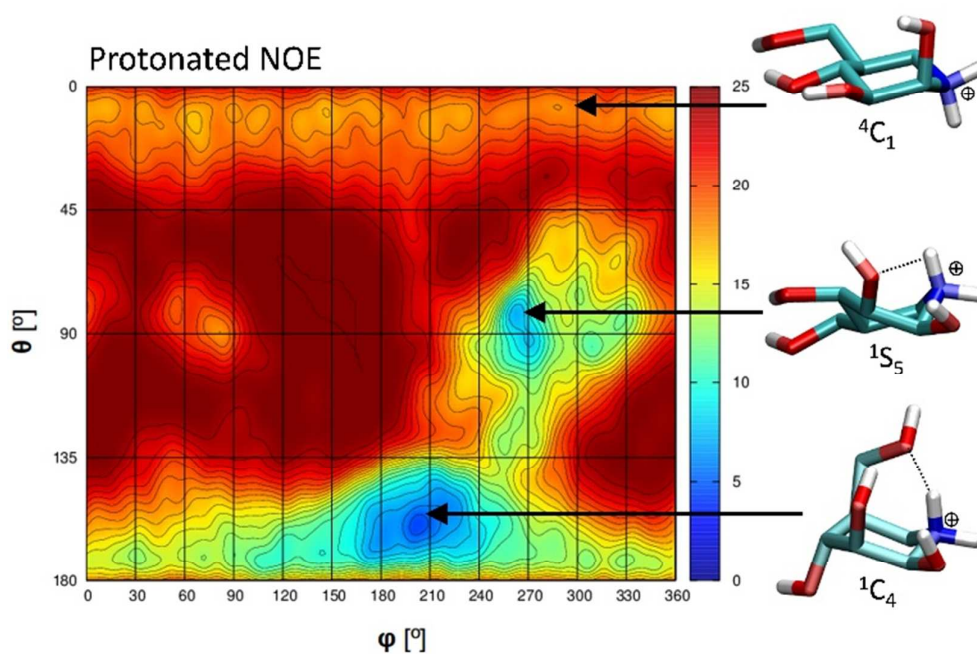

**Figure S5. Conformational free-energy landscape for protonated NOE.**

Conformational free-energy landscape contoured at  $1 \text{ kcal mol}^{-1}$ . The FEL for protonated NOE broadly exhibits the same topology as for neutral NOE, but differs in relative energies of the global and local minima. For protonated NOE the  ${}^1C_4$  conformation is the global minimum, and the  ${}^1S_5$  conformation is stabilized relative to that for the neutral NOE FEL. The extracted structures (shown at right) for the  ${}^4C_1$ ,  ${}^1S_5$  and  ${}^1C_4$  conformations of protonated NOE that suggest the main reason for these changes are the presence of transannular intramolecular hydrogen bonds between the charged group and the 3- or 6-OH groups in the last two conformers that are absent in the first.

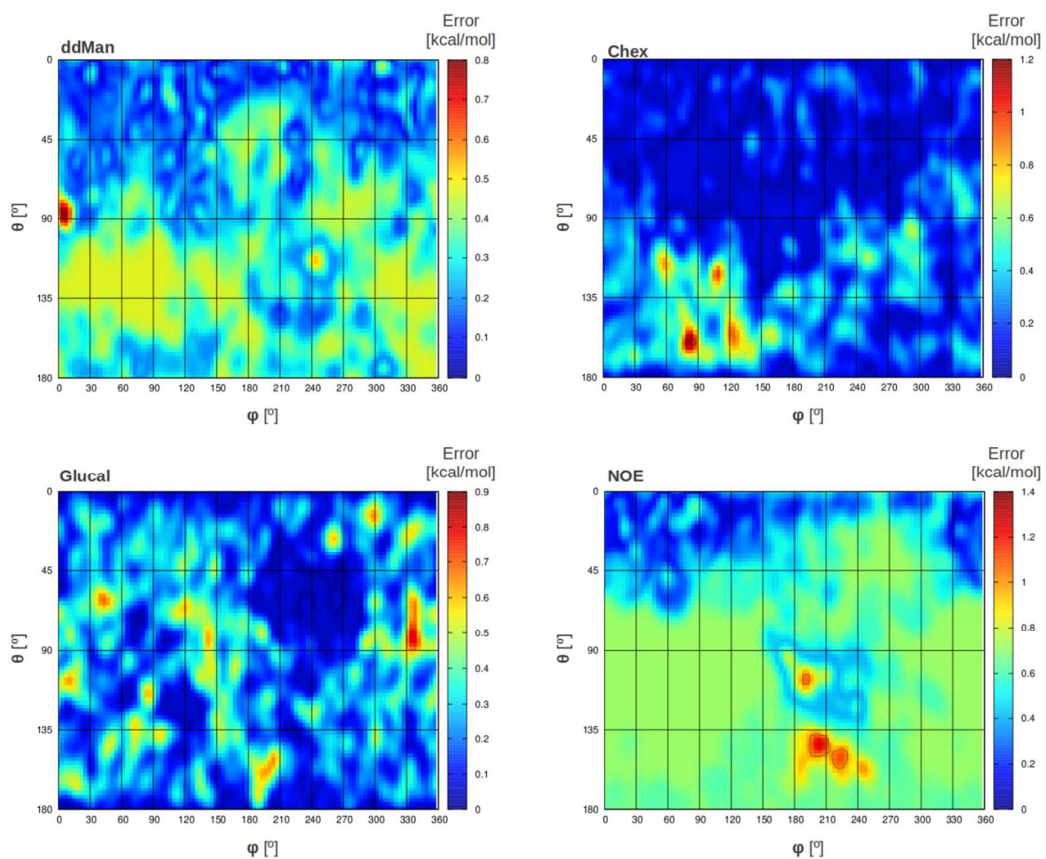

**Figure S6. Error surfaces for all inhibitors.**

Plots were calculated according to the time-independent free energy estimator described by Tiwary and Parrinello.<sup>1</sup> The energy surface for NOE is for the neutral molecule.



SUPPORTING INFORMATION

**Table S1. Data collection and refinement statistics for *BxGH99* complexes**

|                                                     | <i>E333Q</i> – <i>GlcChex</i> | <i>BxGH99</i> – <i>ManddMan</i> | <i>BxGH99</i> – <i>ManddMan</i> – <i>1,2-<math>\alpha</math>-mannobiose</i> | <i>BxGH99</i> – <i>ManGlucal</i> | <i>BxGH99</i> – <i>ManGlucal</i> – <i>2<math>\alpha</math>-mannobiose</i> | <i>BxGH99</i> – <i>ManNOE</i> | <i>BxGH99</i> – <i>ManNOE</i> – <i>2<math>\alpha</math>-mannobiose</i> |
|-----------------------------------------------------|-------------------------------|---------------------------------|-----------------------------------------------------------------------------|----------------------------------|---------------------------------------------------------------------------|-------------------------------|------------------------------------------------------------------------|
| <b>Data collection</b>                              |                               |                                 |                                                                             |                                  |                                                                           |                               |                                                                        |
| Space group                                         | I 4                           | I 4                             | I 4                                                                         | I 4                              | I 4                                                                       | I 4                           | I 4                                                                    |
| Beamline                                            | Diamond i04-1                 | Diamond i02                     | Diamond i02                                                                 | Diamond i02                      | Diamond i02                                                               | Diamond i24                   | Diamond i04                                                            |
| Wavelength (Å)                                      | 0.920                         | 0.979                           | 0.979                                                                       | 0.979                            | 0.979                                                                     | 0.969                         | 0.979                                                                  |
| Cell dimensions                                     |                               |                                 |                                                                             |                                  |                                                                           |                               |                                                                        |
| <i>a</i> , <i>b</i> , <i>c</i> (Å)                  | 108.4, 108.4, 67.8            | 108.6, 108.6, 67.7              | 108.4, 108.4, 67.6                                                          | 108.7, 108.7, 67.6               | 108.6, 108.6, 67.7                                                        | 108.5, 108.5, 67.6            | 108.0, 108.0, 67.5                                                     |
| $\alpha$ , $\beta$ , $\gamma$ (°)                   | 90, 90, 90                    | 90, 90, 90                      | 90, 90, 90                                                                  | 90, 90, 90                       | 90, 90, 90                                                                | 90, 90, 90                    | 90, 90, 90                                                             |
| Resolution (Å)                                      | 39.54-1.2<br>(1.22-1.2)*      | 76.77-1.03<br>(1.05-1.03)       | 76.65-1.04<br>(1.06-1.04)                                                   | 76.85-1.07<br>(1.09-1.07)        | 57.45-1.18<br>(1.12-1.18)                                                 | 76.73-1.14<br>(1.16-1.14)     | 57.21-1.05<br>(1.07-1.05)                                              |
| <i>R</i> <sub>merge</sub>                           | 0.059 (0.955)                 | 0.052 (0.989)                   | 0.052 (1.063)                                                               | 0.052 (1.748)                    | 0.052 (0.790)                                                             | 0.051 (1.158)                 | 0.054 (1.314)                                                          |
| <i>R</i> <sub>pim</sub>                             | 0.022 (0.446)                 | 0.024 (0.566)                   | 0.023 (0.634)                                                               | 0.023 (0.874)                    | 0.028 (0.447)                                                             | 0.022 (0.855)                 | 0.023 (0.915)                                                          |
| <i>CC</i> (1/2)                                     | 0.999 (0.543)                 | 0.994 (0.479)                   | 0.994 (0.427)                                                               | 0.997 (0.33)                     | 0.998 (0.706)                                                             | 0.999 (0.387)                 | 0.999 (0.308)                                                          |
| <i>I</i> / $\sigma$ <i>I</i>                        | 15.3 (1.7)                    | 14.4 (1.2)                      | 13 (1)                                                                      | 10.9 (0.6)                       | 9.1(0.9)                                                                  | 10.6 (0.7)                    | 10.8 (0.7)                                                             |
| Completeness (%)                                    | 98.7 (82.7)                   | 97.5 (73.2)                     | 99 (87.3)                                                                   | 99.8 (96.5)                      | 99.7 (95.5)                                                               | 94.6 (61.5)                   | 99.3 (89.1)                                                            |
| Redundancy                                          | 7.9 (5.3)                     | 6 (3.6)                         | 6 (3.5)                                                                     | 6.3 (4.9)                        | 4.4 (4.0)                                                                 | 5.6 (2.3)                     | 5.9 (2.7)                                                              |
| <b>Refinement</b>                                   |                               |                                 |                                                                             |                                  |                                                                           |                               |                                                                        |
| Resolution (Å)                                      | 39.54-1.20                    | 76.78-1.03                      | 76.65-1.04                                                                  | 76.85-1.07                       | 57.45-1.18                                                                | 76.73-1.14                    | 57.21-1.05                                                             |
| No. reflections<br>all/free                         | 121915/6060                   | 188468/9325                     | 184685/9151                                                                 | 172107/8530                      | 128509/6396                                                               | 134703/6708                   | 178944/8872                                                            |
| <i>R</i> <sub>work</sub> / <i>R</i> <sub>free</sub> | 0.118/0.139                   | 0.117/0.131                     | 0.119/0.134                                                                 | 0.126/0.143                      | 0.136/0.157                                                               | 0.125/0.144                   | 0.115/0.133                                                            |
| Non-H atoms                                         |                               |                                 |                                                                             |                                  |                                                                           |                               |                                                                        |
| Protein                                             | 3152                          | 3211                            | 3231                                                                        | 3150                             | 3163                                                                      | 3227                          | 3166                                                                   |
| Inhibitor/Man2                                      | 21                            | 21                              | 21/34                                                                       | 21                               | 21/23                                                                     | 22                            | 22/34                                                                  |
| Water                                               | 350                           | 423                             | 374                                                                         | 404                              | 358                                                                       | 428                           | 480                                                                    |
| <i>B</i> -factors (Å <sup>2</sup> )                 |                               |                                 |                                                                             |                                  |                                                                           |                               |                                                                        |
| Protein                                             | 16.8                          | 15.0                            | 15.5                                                                        | 17.1                             | 17.0                                                                      | 17.3                          | 15.6                                                                   |
| Inhibitor/Man2                                      | 15.5                          | 12.5                            | 12.8/18.4                                                                   | 14.5                             | 14.7/24.9                                                                 | 16.7                          | 12.3/15.2                                                              |
| Water                                               | 31.5                          | 33.3                            | 32.6                                                                        | 35.7                             | 33.8                                                                      | 35.4                          | 35.9                                                                   |
| R.m.s. deviations                                   |                               |                                 |                                                                             |                                  |                                                                           |                               |                                                                        |
| Bond lengths (Å)                                    | 0.0122                        | 0.0103                          | 0.0111                                                                      | 0.0109                           | 0.0102                                                                    | 0.0106                        | 0.0131                                                                 |
| Bond angles (°)                                     | 1.586                         | 1.53                            | 1.609                                                                       | 1.535                            | 1.458                                                                     | 1.502                         | 1.673                                                                  |
| <b>PDB ID</b>                                       | 5MEL                          | 5M17                            | 5M3W                                                                        | 5M5D                             | 5MC8                                                                      | 5LYR                          | 5M03                                                                   |

\*Values in parentheses are for highest-resolution shell.

## SUPPORTING INFORMATION

### Protein expression, purification, and crystallization

#### *Gene expression and protein purification*

*E. coli* BL21 (DE3) cells were transformed by plasmids reported previously<sup>2</sup> containing *BtGH99* (pETYSBLic), *BxGH99* wild-type, E333Q and E336Q (pET28a). Single clones were shaken at 180 rpm and 37 °C in 50 ml tubes (Falcon) containing 5 ml LB media with 50 µg ml<sup>-1</sup> kanamycin. Large-scale selective LB cultures in 2 l conical flasks were inoculated 1:1000 with starter cultures and shaken at 180 rpm and 37 °C until the OD<sub>600</sub> was higher than 1, induced using then switched to 16 °C for 24 h. Cell pellets were separated from the media by centrifugation, resuspended in 25 mM HEPES pH 7.0, 300 mM NaCl, 20 mM imidazole and lysed by sonication. The lysate was centrifuged twice and the supernatant was applied to a pre-equilibrated 5 ml HisTrap FF or FF crude column (GE). Protein bound to the column was eluted using imidazole gradient (up to 500 mM). Fractions containing purest protein were combined and concentrated using Amicon Ultra 30 kDa concentrator (Millipore). Further purification was done using a Sepharose S75 16/60 or 16/600 column equilibrated in 25 mM HEPES pH 7.0, 100 mM NaCl, 1 mM DTT, which was also used as the buffer for storage. Fractions containing pure GH99 proteins were combined, concentrated as previously, aliquoted, flash frozen in liquid nitrogen and stored at -80 °C.

#### *Crystallization and Data Collection*

*BxGH99* wild-type and E333Q variant were crystallized in darkness at 19 °C using 24-well plates (Greiner Bio-One) using hanging drop vapour diffusion method. Each 0.5 ml reservoir solution contained 3 M sodium acetate at pH 6.4-7.4. The hanging drop was created by mixing 1 volume of protein solution (30 mg ml<sup>-1</sup>) with 1 volume of reservoir solution. Soaking was performed by adding 0.5-1 droplet volume of 20 mM ligand stock to the droplet with grown *BxGH99* crystals. Initial cryoprotection with 20% ethylene glycol before flash freezing in liquid nitrogen was omitted for ManNOE soaks because the diffraction of X-rays by the crystals was not adversely affected.

## Synthetic chemistry

### General

<sup>1</sup>H and <sup>13</sup>C NMR were recorded using 400, 500 or 600 MHz instruments. All signals were referenced to solvent peaks (CDCl<sub>3</sub>: δ 7.26 ppm for <sup>1</sup>H or 77.16 ppm for <sup>13</sup>C; D<sub>2</sub>O: δ 4.80 ppm for <sup>1</sup>H). TLC analysis used aluminium backed Merck Silica Gel 60 F<sub>254</sub> sheets, detection was achieved using UV light or 10% H<sub>2</sub>SO<sub>4</sub> in MeOH. Flash chromatography was performed using Geduran silica gel according to the method of Still *et al.*<sup>3</sup> THF and CH<sub>2</sub>Cl<sub>2</sub> were dried according to the method of Pangborn *et al.*<sup>4</sup>

### 2,3,4,6-Tetra-*O*-acetyl- $\alpha$ -D-mannopyranosyl-(1 $\rightarrow$ 3)-1,2,4,6-tetra-*O*-acetyl- $\alpha$ , $\beta$ -D-mannopyranose (**11**)

Acetic anhydride (0.61 mL) was added slowly to a solution of 1,3- $\alpha$ -mannobiose **10** (50.8 mg, 0.148 mmol) and DMAP (18.1 mg, 0.148 mmol) in pyridine (1.22 mL) at 0 °C. The mixture was warmed to rt and stirred for 16 h. The mixture was diluted with EtOAc (20 mL) and washed with water (2  $\times$  20 mL), aq. sat. NaHCO<sub>3</sub> (4  $\times$  10 mL), aq. 1 M HCl (4  $\times$  10 mL), and brine (2  $\times$  10 mL), then dried (MgSO<sub>4</sub>) and concentrated to afford the crude octaacetate **11** (97.7 mg, 97%;  $\alpha/\beta$  1.0:0.4) as a pale yellow oil,  $\alpha$  anomer; <sup>1</sup>H NMR (400 MHz, CDCl<sub>3</sub>): δ 1.99–2.26 (24 H, 8  $\times$  s, Ac), 3.94 (1 H, m, H5), 4.04 (1 H, m, H5'), 4.08 (2 H, m, H6a,6a'), 4.17 (1 H, dd,  $J_{2,3}$  = 3.5,  $J_{3,4}$  = 10.0 Hz, H3), 4.26 (2 H, m, H6b,6b'), 5.00 (2 H, m, H1',2'), 5.19 (1 H, dd,  $J_{2,3}$  = 3.0,  $J_{3,4}$  = 10.0 Hz, H3'), 5.23 (1 H, dd,  $J_{1,2}$  = 2.0,  $J_{2,3}$  = 3.5 Hz, H2), 5.27 (1 H, t,  $J_{3,4}$  =  $J_{4,5}$  = 10.0 Hz, H4'), 5.36 (1 H, t,  $J_{3,4}$  =  $J_{4,5}$  = 10.0 Hz, H4), 6.08 ppm (1 H, d,  $J_{1,2}$  = 2.0 Hz, H1); <sup>13</sup>C NMR (100 MHz, CDCl<sub>3</sub>) δ 20.6–21.0 (8 C, 8  $\times$  Me), 62.3, 62.5 (2 C, C6,6'), 66.0, 67.2, 68.3, 69.7, 69.8, 70.1, 70.9, 75.0 (8 C, C2,3,4,5,2',3',4',5'), 90.8 (1 C, C1'), 99.2 (1 C, C1), 168.0–170.8 ppm (8 C, 8  $\times$  C=O).

### (2,3,4,6-Tetra-*O*-acetyl- $\alpha$ -D-mannopyranosyl)-(1 $\rightarrow$ 3)-(2,4,6-tri-*O*-acetyl- $\alpha$ -D-mannopyranosyl) bromide (**12**)

The octaacetate **11** (96.9 mg, 0.142 mmol) was dissolved in 33% w/v HBr/AcOH (0.1 mL, 0.507 mmol) and stirred for 3 h. The mixture was diluted with EtOAc (20 mL), poured into ice water and quickly washed with NaHCO<sub>3</sub> (3  $\times$  10 mL), and brine (2  $\times$  10 mL), then dried (MgSO<sub>4</sub>) and co-evaporated with toluene under reduced pressure to afford the crude glycosyl bromide **12** as a viscous brown oil, which was used directly in the next step; <sup>1</sup>H NMR (400 MHz, CDCl<sub>3</sub>), partial spectrum: δ 4.60 (1 H, dd,  $J_{1,2}$  = 12.0,  $J_{2,3}$  = 4.0 Hz, H2), 5.38 (1 H, t,  $J_{3,4}$  =  $J_{4,5}$  = 8.0 Hz, H4), 6.34 ppm (1 H, d,  $J_{1,2}$  = 1.4 Hz, H1).

### 2,3,4,6-Tetra-*O*-acetyl- $\alpha$ -D-mannopyranosyl-(1 $\rightarrow$ 3)-4,6-di-*O*-acetyl-1,5-anhydro-2-deoxy-D-arabino-hex-1-enitol (**13**)

Activated Zn (46.7 mg, 0.714 mmol), NH<sub>4</sub>Cl (38.2 mg, 0.714 mmol), and VO(salen)<sup>5</sup> (0.478 mg, 7.10  $\mu$ mol) were added to the crude bromide **12** (99.9 mg, 0.143 mmol) in methanol (1.5 mL) and the mixture was stirred for 30 min. The mixture was filtered through Celite and concentrated to give a light-brown residue that was diluted with EtOAc (20 mL) and washed with water (2  $\times$  20 mL), aq. sat. NaHCO<sub>3</sub> (2  $\times$  10 mL), and brine (2  $\times$  10 mL), then dried (MgSO<sub>4</sub>) and concentrated to give a pale-yellow residue. Flash chromatography (EtOAc/pet. spirits/Et<sub>3</sub>N 50:49.5:0.5) afforded the protected glucal **13** (18.1 mg, 23% over two steps) as a golden-yellow oil;  $[\alpha]_D^{23}$  -2.62 (*c* 0.31, CHCl<sub>3</sub>); <sup>1</sup>H NMR (500 MHz, CDCl<sub>3</sub>): δ 1.99 (3 H, s, Ac), 2.04 (3 H, s, Ac), 2.10 (3 H, s, Ac), 2.11 (6 H, 2  $\times$  s, Ac), 2.15 (3 H, s, Ac), 4.08 (1 H, m, H5'), 4.11 (1 H, dd,  $J_{5,6a}$  = 2.5,  $J_{6a,6b}$  = 12.2 Hz, H6a), 4.18 (1 H, dd,  $J_{5',6a'}$  = 4.0,  $J_{6a',6b'}$  = 12.0 Hz, H6a'), 4.21 (1 H, m, H3), 4.25 (1 H, m, H5), 4.27 (1 H, dd,  $J_{5,6b}$  = 5.0,  $J_{6a,6b}$  = 15.0 Hz, H6b), 4.43 (1 H, dd,  $J_{5',6b'}$  = 6.2,  $J_{6a',6b'}$  = 11.9 Hz, H6b'), 4.87 (1 H, dd,  $J_{1,2}$  = 6.2,  $J_{2,3}$  = 3.6 Hz, H2), 5.05 (1 H, d,  $J_{1',2'}$  = 1.7 Hz, H1'), 5.12 (1 H, dd,  $J_{1',2'}$  = 2.8,  $J_{2',3'}$  = 1.9 Hz, H2'), 5.19 (1 H, dd,  $J_{3,4}$  = 5.0,  $J_{4,5}$  = 6.7 Hz, H4), 5.28 (2 H, m, H3',4'), 6.44 ppm (1 H, dd,  $J_{1,2}$  = 6.2,  $J_{1,3}$  = 1.3 Hz, H1); <sup>13</sup>C NMR (125 MHz, CDCl<sub>3</sub>) δ 20.8–21.0 (6 C, 6  $\times$  Me), 61.3 (1 C, C6'), 62.7 (1 C, C6), 66.3 (1 C, C4'), 68.1 (1 C, C4), 68.8 (1 C, C3'), 69.2 (1 C, C5'), 69.9 (1 C, C2'), 72.2 (1 C, C3), 73.9 (1 C, C5), 97.8 (1 C, C1'), 99.8 (1 C, C2), 145.2 (1 C, C1), 169.8–170.8 ppm (6 C, 6  $\times$  C=O); HRMS (ESI)<sup>+</sup> *m/z* 578.2080 [C<sub>24</sub>H<sub>34</sub>NO<sub>15</sub> (M+NH<sub>4</sub>)<sup>+</sup> requires 578.2079].

**2,3,4,6-Tetra-*O*-acetyl- $\alpha$ -D-mannopyranosyl-(1 $\rightarrow$ 3)-(4,6-di-*O*-acetyl-1,2-dideoxy-D-mannopyranose (14)**

A mixture of the glucal **13** (5.60 mg, 9.99  $\mu$ mol) and 5% Pd/C (8.5 mg) in methanol (1.5 mL) was stirred under a hydrogen atmosphere for 2 h. The mixture was filtered through Celite and concentrated, followed by acetylation with acetic anhydride (0.5 mL) in pyridine (0.5 mL). Flash chromatography (EtOAc/pet. spirits 30:70) afforded the dideoxy compound **14** (4.50 mg, 80%) as a colourless oil;  $[\alpha]_D^{23} +16$  (*c* 0.42, CHCl<sub>3</sub>); <sup>1</sup>H NMR (600 MHz, CDCl<sub>3</sub>):  $\delta$  1.90 (1 H, dddd,  $J_{1a,2a} = 5.0$ ,  $J_{1b,2a} = 11.6$ ,  $J_{2a,2b} = 12.8$ ,  $J_{2a,3} = 12.8$  Hz, H2a), 1.99 (3 H, s, Ac), 2.04 (3 H, s, Ac), 2.08 (3 H, s, Ac), 2.09 (1 H, m, H2b), 2.10 (3 H, s, Ac), 2.12 (3 H, s, Ac), 2.15 (3 H, s, Ac), 3.45 (2 H, m, H1a,5), 3.75 (1 H, ddd,  $J_{1a,1b} = 9.2$ ,  $J_{1b,2a} = 11.6$ ,  $J_{1b,2b} = 5.1$  Hz, H1b), 4.01–4.15 (4 H, m, H3,5',6b,6b'), 4.19 (1 H, dd,  $J_{5,6a} = 5.15$ ,  $J_{6a,6b} = 12.3$  Hz, H6a), 4.25 (1 H, dd,  $J_{5',6a'} = 5.6$ ,  $J_{6a',6b'} = 12.3$  Hz, H6a'), 4.96 (2 H, m, H4,1'), 5.04 (1 H, m, H2'), 5.27 ppm (2 H, m, H3',4'); <sup>13</sup>C NMR (150 MHz, CDCl<sub>3</sub>)  $\delta$  20.8–21.0 (6 C, 6  $\times$  Me), 29.8 (1 C, C5), 32.9 (1 C, C2), 62.7 (1 C, C6'), 63.0 (1 C, C6), 65.6 (1 C, C1), 66.5 (1 C, C4'), 68.7 (1 C, C3'), 69.1 (1 C, C5'), 70.2 (1 C, C2'), 70.6 (1 C, C4), 79.7 (1 C, C3), 98.8 (1 C, C1'), 169.8–171.0 ppm (6 C, 6  $\times$  C=O); HRMS (ESI)<sup>+</sup> *m/z* 580.2234 [C<sub>24</sub>H<sub>38</sub>NO<sub>15</sub> (M+NH<sub>4</sub>)<sup>+</sup> requires 580.2236].

**$\alpha$ -D-Mannopyranosyl-(1 $\rightarrow$ 3)-1,2-dideoxy-D-mannopyranose (ManddMan; 5)**

Sodium methoxide in methanol (0.217 M, 25.0  $\mu$ L, 5.40  $\mu$ mol) was added to compound **14** (8.00 mg, 0.0142 mmol) in methanol (1.3 mL) and the solution was stirred for 2 h. The mixture was neutralised using Dowex-50 resin (H<sup>+</sup> form) and filtered. Reverse phase chromatography (H<sub>2</sub>O, 100%) afforded ManddMan **5** (3.50 mg, 80%) as a colourless oil;  $[\alpha]_D^{25} +49.8$  (*c* 0.19, CH<sub>3</sub>OH); <sup>1</sup>H NMR (400 MHz, D<sub>2</sub>O):  $\delta$  1.74 (1 H, dddd,  $J_{1a,2a} = 5.0$ ,  $J_{1b,2a} = 11.7$ ,  $J_{2a,2b} = 12.8$ ,  $J_{2a,3} = 12.8$  Hz, H2a), 2.16 (1 H, m, H2b), 3.34 (1 H, m, H5), 3.42 (1 H, t,  $J_{3,4} = J_{4,5} = 8.0$  Hz, H4), 3.54 (1 H, m, H1a), 3.63–3.90 (8 H, m, H1b,3',4',5',6a,6a',6b,6b'), 3.97 (1 H, m, H3), 4.03 (1 H, dd,  $J_{1',2'} = 3.4$ ,  $J_{2',3'} = 1.8$  Hz, H2'), 5.13 ppm (1 H, d,  $J_{1',2'} = 1.6$  Hz, H1'); <sup>13</sup>C NMR (150 MHz, D<sub>2</sub>O)  $\delta$  32.3 (1 C, C2), 60.98 (1 C, C3), 60.99 (1 C, C6), 65.3 (1 C, C1), 66.8 (1 C, C4'), 70.1 (1 C, C2'), 70.4 (2 C, C4,6'), 73.1 (1 C, C3'), 80.2 (1 C, C5'), 80.4 (1 C, C5), 101.7 ppm (1 C, C1'); HRMS (ESI)<sup>+</sup> *m/z* 333.1152 [C<sub>12</sub>H<sub>22</sub>O<sub>9</sub>Na (M+Na)<sup>+</sup> requires 333.1156].

**$\alpha$ -D-Mannopyranosyl-(1 $\rightarrow$ 3)-1,5-anhydro-2-deoxy-D-arabino-hex-1-enitol (ManGlucal; 7)**

Sodium methoxide in methanol (0.217 M, 8.00  $\mu$ L, 1.74  $\mu$ mol) was added to a solution of the glucal **13** (8.20 mg, 0.0146 mmol) in methanol (0.64 mL) and the resulting solution was stirred for 2 h. The mixture was concentrated, followed by reverse phase chromatography (H<sub>2</sub>O 100) to afford the deprotected disaccharide **7** (3.90 mg, 87%) as a colourless oil;  $[\alpha]_D^{23} +18$  (*c* 0.145, CH<sub>3</sub>OH); <sup>1</sup>H NMR (400 MHz, D<sub>2</sub>O):  $\delta$  3.64–3.94 (8 H, m, H4,5,6a,6b,3',4',6a',6b'), 3.99 (1 H, dd,  $J_{1',2'} = 3.4$ ,  $J_{2',3'} = 1.8$  Hz, H2'), 4.02 (1 H, ddd,  $J_{4,5} = 8.5$ ,  $J_{5',6a'} = 5.6$ ,  $J_{5',6b'} = 2.9$  Hz, H5'), 4.30 (1 H, m, H3), 4.93 (1 H, dd,  $J_{1,2} = 6.15$ ,  $J_{2,3} = 2.9$  Hz, H2), 5.17 (1 H, d,  $J_{1',2'} = 1.7$  Hz, H1'), 6.48 ppm (1 H, dd,  $J_{1,2} = 6.1$ ,  $J_{1,3} = 1.3$  Hz, H1); <sup>13</sup>C NMR (100 MHz, D<sub>2</sub>O)  $\delta$  59.7 (1 C, C6), 60.9 (1 C, C5), 66.7 (1 C, C4'), 67.1 (1 C, C4), 70.1 (1 C, C2'), 70.3 (1 C, C3'), 73.1 (1 C, C6'), 74.3 (1 C, C3), 78.3 (1 C, C5'), 100.3 (1 C, C1'), 100.7 (1 C, C2), 144.6 ppm (1C, C1); HRMS (ESI)<sup>+</sup> *m/z* 331.1000 [C<sub>12</sub>H<sub>20</sub>O<sub>9</sub>Na (M+Na)<sup>+</sup> requires 331.1000].

**Benzyl 2-*O*-(2-*O*-acetyl-3,4,5-tri-*O*-benzyl- $\alpha$ -mannopyranosyl)-(1 $\rightarrow$ 2)-(4-cyano-4-deoxy- $\beta$ -D-arabinopyranoside) (17)**

TfOH (4.4  $\mu$ L, 0.050 mmol) was added to a mixture of acceptor **16** (125 mg, 0.50 mmol), 2-*O*-acetyl-3,4,5-tri-*O*-benzyl- $\alpha$ -mannopyranosyl trichloroacetimidate<sup>6</sup> **15** (372 mg, 0.625 mmol) and 4 Å mol. sieves in CH<sub>2</sub>Cl<sub>2</sub> at -40 °C. The mixture was stirred for 15 min, warmed to 0 °C and quenched with Et<sub>3</sub>N (7.0  $\mu$ L, 5.07 mmol) then concentrated under reduced pressure. Flash chromatography (EtOAc/pet. spirits 40:60) gave the disaccharide **17** (168 mg, 46%) as a colourless oil;  $[\alpha]_D^{23} -44$ , (*c* 0.9, CHCl<sub>3</sub>); <sup>1</sup>H NMR (500 MHz, CDCl<sub>3</sub>):  $\delta$  1.21 (3 H, s, Ac), 3.17–3.18 (1 H, m, H4), 3.32 (1 H, s, OH), 3.5 (1 H, dd,  $J_{5',6a'} = 6.5$ ,  $J_{6a',6b'} = 10.5$  Hz, H6a'), 3.60 (1 H, dd,  $J_{5',6b'} = 1.5$ ,  $J_{6a',6b'} = 10$  Hz, H6b'), 3.67–3.96 (6 H, m, H2,3',4',5a,5b,5'), 4.18–4.22 (1 H, m, H3),

4.44-4.61 (6 H, m, 6 × CH<sub>2</sub>Ph), 4.69 (1 H, dd, *J* = 11 Hz, CH<sub>2</sub>Ph), 4.84 (1 H, dd, *J* = 11 Hz, CH<sub>2</sub>Ph), 5.18 (1 H, dd, *J*<sub>1,2</sub> = 3.5 Hz, H1), 5.23 (1 H, d, *J*<sub>1',2'</sub> = 1.5 Hz, H1'), 5.39-5.40 (1 H, m, H2'), 7.14-7.32 ppm (20 H, m, Ph); <sup>13</sup>C NMR (125 MHz, CDCl<sub>3</sub>): δ 21.1 (1 C, Ac), 36.5 (1 C, C4), 58.5 (1 C, C5), 64.3 (1 C, C3), 68.7, 69.3, 69.8, 72.1, 72.1, 73.7, 74.4, 74.9, 78.1, 78.9 (C2,2',3',4,5',6',4 × CH<sub>2</sub>Ph), 97.9 (1 C, C1), 99.1 (1 C, C1'), 127.6, 127.8, 127.9, 128.1, 128.2, 128.3, 128.4, 128.5, 128.7 ppm (24 C, 4 × Ph); HRMS (ESI)<sup>+</sup> *m/z* 741.3401 [C<sub>42</sub>H<sub>45</sub>NO<sub>10</sub> (M+NH<sub>4</sub><sup>+</sup>) requires 741.3382].

**Benzyl 2-*O*-(2-*O*-acetyl-3,4,5-tri-*O*-benzyl- $\alpha$ -mannopyranosyl)-(1→2)-(3-*O*-acetyl-4-cyano-4-deoxy- $\beta$ -D-arabinopyranoside)**

A mixture of acetic anhydride (250  $\mu$ L) and disaccharide **17** (20 mg, 0.028 mmol) in pyridine (500  $\mu$ L) was stirred at rt for 18 h. The solution was concentrated under reduced pressure and the residue was azeotroped with toluene (3 × 10 mL). Flash chromatography (EtOAc/pet. spirits 45:55) of the residue gave the title compound (10.8 g, 49%) as a colourless oil; [ $\alpha$ ]<sub>D</sub><sup>24</sup> -66 (*c* 0.29, CHCl<sub>3</sub>); <sup>1</sup>H NMR (500 MHz, CDCl<sub>3</sub>): δ 2.13 (3 H, s, Ac), 2.19 (3 H, s, Ac), 3.41-3.42 (1 H, m, H4), 3.50 (1 H, dd, *J*<sub>5',6a'</sub> = 1.5, *J*<sub>6a',6b'</sub> = 10.5, H6a'), 3.55-3.70 (2 H, m, H5',6b'), 3.78-3.82 (2 H, m, H4',5a), 3.90 (1 H, dd, *J*<sub>2',3'</sub> = 3.5, *J*<sub>3',4'</sub> = 9.4 Hz, H3'), 3.97-4.03 (2 H, m, H2,5b), 4.45-4.67 (7 H, m, CH<sub>2</sub>Ph), 4.86 (1 H, d, *J* = 10.9 Hz, CH<sub>2</sub>Ph), 5.02 (1 H, d, *J*<sub>1',2'</sub> = 1.5 Hz, H1'), 5.08 (1 H, d, *J*<sub>1,2</sub> = 3.6 Hz, H1), 5.21 (1 H, dd, *J*<sub>2,3</sub> = 5.5, *J*<sub>3,4</sub> = 10.4 Hz, H3), 5.24-5.25 (1, m, H2), 7.12-7.37 ppm (20 H, m, 4 × Ph); <sup>13</sup>C NMR (125 MHz, CDCl<sub>3</sub>): δ 20.9 (1 C, Ac), 21.2 (1 C, Ac), 34.5 (1 C, C4), 58.2 (1 C, C5), 67.7 (1 C, C3), 68.9 (2 C, C2', CH<sub>2</sub>Ph), 70.7 (1 C, CH<sub>2</sub>Ph), 72.1 (1 C, CH<sub>2</sub>Ph), 72.4 (1 C, C5'), 73.7 (1 C, CH<sub>2</sub>Ph), 74.3 (1 C, C4'), 74.9 (1 C, C2), 75.1 (1 C, CH<sub>2</sub>Ph), 77.9 (1 C, C3'), 97.2 (1 C, C1), 100.0 (1 C, C1'), 127.7, 127.9, 128.1, 128.2, 128.3, 128.4, 128.5, 128.6, 128.8 ppm (24 C, 4 × Ph); HRMS (ESI)<sup>+</sup> *m/z* 788.3063 [C<sub>44</sub>H<sub>47</sub>NaO<sub>11</sub> (M+Na)<sup>+</sup> requires 788.3041]. The downfield shift of H3' relative to that in compound **17** provided evidence for the regiochemistry of the glycosylation reaction.

**Benzyl 2-*O*-(3,4,5-tri-*O*-benzyl- $\alpha$ -mannopyranosyl)-(1→2)-(4-cyano-4-deoxy- $\beta$ -D-arabinopyranoside) (18)**

Acetyl chloride (860  $\mu$ L) was added to disaccharide **17** (127 mg, 0.175 mmol) in MeOH (20 mL) and the mixture was stirred for 18 h at rt. The reaction was quenched with Et<sub>3</sub>N (1.67 mL, 12 mmol) and the solvent evaporated under reduced pressure. Flash chromatography (EtOAc/pet. spirits 50:50) of the residue gave the diol **18** (84 mg, 70 %) as a colourless oil; [ $\alpha$ ]<sub>D</sub><sup>23</sup> -62, (*c* 2.26, CHCl<sub>3</sub>); <sup>1</sup>H NMR (500 MHz, CDCl<sub>3</sub>): δ 2.59 (1 H, s, OH), 3.15 (1 H, m, H4), 3.30 (1 H, s, OH), 3.48, (1 H, dd, *J*<sub>5',6a'</sub> = 5.4, *J*<sub>6a',6b'</sub> = 8.6 Hz, H6a'), 3.57 (1 H, dd, *J*<sub>5',6b'</sub> = 1.6, *J*<sub>6a',6b'</sub> = 8.5 Hz, H6b'), 3.69 (1 H, t, H4), 3.78 (1 H, dd, *J*<sub>4,5a</sub> = 1.5, *J*<sub>5a,5b</sub> = 10.0 Hz, H5a), 3.83-5.85 (3 H, m, H2,3',5b), 3.93 (1 H, m, H5'), 3.99 (1 H, m, H2'), 4.19 (1 H, dd, *J*<sub>3,4</sub> = 4.6, *J*<sub>2,3</sub> = 8.2 Hz, H3), 4.45-4.67 (7 H, m, CH<sub>2</sub>Ph), 4.80 (1 H, d, *J* = 9.3 Hz, CH<sub>2</sub>Ph), 5.20 (1 H, d, *J*<sub>1,2</sub> = 3.0 Hz, H1), 5.27 (1 H, d, *J*<sub>1',2'</sub> = 1.5 Hz, H1'), 7.23-7.33 ppm (24 H, m, 4 × Ph); <sup>13</sup>C NMR (125 MHz, CDCl<sub>3</sub>): δ 36.4 (1 C, C4), 58.5 (1 C, C5), 64.9 (1 C, C3), 68.5, 69.3, 69.8, 71.8, 72.5, 73.6, 74.4, 74.8, 78.8, 79.8 (10 C, C2,2',3',4',5',6',4 × CH<sub>2</sub>Ph), 98.0 (1 C, C1), 100.6 (1 C, C1'), 127.7, 127.8, 1280, 128.1, 128.4, 128.5, 128.7 ppm (20 C, 4 × Ph); HRMS (ESI)<sup>+</sup> *m/z* 699.3304 [C<sub>40</sub>H<sub>43</sub>NO<sub>9</sub> (M+NH<sub>4</sub><sup>+</sup>) requires 699.3276].

**Benzyl 2-*O*-(2-*O*-acetyl-2,4,5-tri-*O*-benzyl- $\alpha$ -mannopyranosyl)-(1→2)-(4-*C*-[(*tert*-butoxycarbonyl)amino]methyl-4-deoxy- $\beta$ -D-arabinopyranoside) (19)**

Borane dimethyl sulfide complex (35.7  $\mu$ L, 0.379 mmol) was added dropwise to nitrile **18** (57.1 mg, 0.0838 mmol) in anhydrous THF (3 mL), and the mixture was stirred under reflux for 24 h. MeOH (3 mL) was added dropwise and reflux continued for an additional 18 h. The solvent was evaporated under reduced pressure and the residue was azeotroped with MeOH (3 × 20 mL) and evaporated to dryness under reduced pressure. The residue was dissolved in THF/MeOH (1:3, 12 mL) and treated with 10% aq. Na<sub>2</sub>CO<sub>3</sub> (2 mL) and (Boc)<sub>2</sub>O (36.6 mg, 0.168 mmol). After 2 h the mixture was filtered and the filtrate concentrated under

reduced pressure. Flash chromatography (EtOAc/pet. spirits 50:50) of the residue gave the carbamate **19** (44.7 mg, 68 %) as a colourless oil;  $[\alpha]_D^{23}$  -26 (*c* 1.2, CHCl<sub>3</sub>); <sup>1</sup>H NMR (500 MHz, CDCl<sub>3</sub>): δ 1.45 (9 H, s, 3 × CH<sub>3</sub>), 2.11 (1 H, m, H4), 2.60 (1 H, m, OH), 3.24 (1 H, m, H6a'), 3.39-3.48 (4 H, m, H5a,6b', CH<sub>2</sub>NHBoc), 3.56 (1 H, dd, *J*<sub>4,5b</sub> = 4.5, *J*<sub>5a,5b</sub> = 11 Hz, H5b), 3.76-4.15 (6 H, H2, 2',3,3',4',5'), 4.41-4.80 (8H, m, 4 × CH<sub>2</sub>Ph), 5.01 (2 H, m, H1', NH), 5.15 (1 H, s, H1), 7.15-7.35 (20 H, m, 4 × Ph); <sup>13</sup>C NMR (125 MHz, CDCl<sub>3</sub>): δ 28.5 (3 C, CH<sub>3</sub>), 38.1 (1 C, C6'), 40.7 (1 C, C4), 61.4 (C5), 66.9, 68.8, 69.0, 69.8, 71.3, 72.3, 73.6, 74.4, 74.7, 76.3, 79.9, 80.1 (10 C, C2,2',3,3',4',5',CH<sub>2</sub>NHBoc, 4 × CH<sub>2</sub>Ph), 98.0 (1 C, C1), 99.8 (1 C, C1'), 127.6, 127.7, 127.8, 127.9, 128.0, 128.2, 128.3, 128.4, 128.5, 128.6 (24 C, 4 × Ph); HRMS (ESI)<sup>+</sup> *m/z* 803.4132 [C<sub>45</sub>H<sub>55</sub>NO<sub>11</sub> (M+NH<sub>4</sub>)<sup>+</sup> requires 803.4113].

#### **α-D-Mannopyranosyl-(1→3)-noeuromycin hydrochloride (ManNOE.HCl; 9)**

The carbamate **19** (21.7 mg, 00276 mmol) in THF/H<sub>2</sub>O (1:1, 5 mL) was treated with Pd(OH)<sub>2</sub>/C (10%, 10 mg) and H<sub>2</sub> (15 atm, 18 h). The suspension was filtered, concentrated and subject to flash chromatography (CHCl<sub>3</sub>/MeOH/H<sub>2</sub>O 70:27:1) to give a colourless oil. The oil was treated with 1 M aq. HCl (2 mL) and stirred for 30 min. The solution was concentrated under reduced pressure to give ManNOE.hydrochloride **9** as a colourless residue. NMR data of the noeuromycins ('glc' has an equatorial 2-OH, 'man' has an axial 2-OH, 'p-glc' and 'p-man' are the pyranose tautomers);  $[\alpha]_D^{25}$  +38, 0.5 M; <sup>1</sup>H NMR (500 MHz, CDCl<sub>3</sub>): δ 1.95-2.05 (m, H5-man, H5-glc), 2.96-3.94 (m, H2',3,3',4,4',5',6a,6b,6a',6b'), 4.07 (dd, *J*<sub>1',2'</sub> = 1.5, *J*<sub>2',3'</sub> = 3 Hz, H2'-glc), 4.09 (dd, *J*<sub>1',2'</sub> = 1.5, *J*<sub>2',3'</sub> = 3.5 Hz, H2'-man), 4.66 (m, H2-p-glc), 4.72 (m, H2-glc), 5.04 (d, *J*<sub>1',2'</sub> = 1.5 Hz, H1'-p-man), 5.12 (d, *J*<sub>1',2'</sub> = 1.5 Hz, H1'-man), 5.18 (d, *J*<sub>1',2'</sub> = 1.5 Hz, H1'-p-glc), 5.24 (d, *J*<sub>1',2'</sub> = 1.5 Hz, H1'-glc), 5.36 (d, *J*<sub>2,3</sub> = 3.5 Hz, H2-p-man), 5.43 ppm (d, *J*<sub>2,3</sub> = 3.5 Hz, H2-man); <sup>13</sup>C NMR (125 MHz, CDCl<sub>3</sub>): δ 37.3, 38.1, 40.7, 40.7, 40.9, 41.2, 55.4, 58.6, 58.8, 59.0, 60.6, 60.8, 60.9, 65.9, 66.3, 66.4, 66.5, 66.7, 69.7, 69.9, 70.0, 70.2, 70.3, 70.4, 72.3, 72.9, 73.2, 73.5, 77.4, 78.9, 80.0, 80.2, 91.8, 101.4, 101.6, 102.5 ppm; HRMS (ESI)<sup>+</sup> *m/z* 326.1444 [C<sub>12</sub>H<sub>35</sub>NO<sub>9</sub> (M+ NH<sub>4</sub>)<sup>+</sup> requires 326.1446].

#### **References**

- (1) Tiwary, P.; Parrinello, M. *J. Phys. Chem. B* **2015**, *119*, 736-42.
- (2) Thompson, A. J.; Williams, R. J.; Hakki, Z.; Alonzi, D. S.; Wennekes, T.; Gloster, T. M.; Songsrirote, K.; Thomas-Oates, J. E.; Wrodnigg, T. M.; Spreitz, J.; Stutz, A. E.; Butters, T. D.; Williams, S. J.; Davies, G. J. *Proc. Natl. Acad. Sci. USA* **2012**, *109*, 781-6.
- (3) Still, W. C.; Kahn, M.; Mitra, A. M. *J. Org. Chem.* **1978**, *43*, 2923-5.
- (4) Pangborn, A. B.; Giardello, M. A.; Grubbs, R. H.; Rosen, R. K.; Timmers, F. J. *Organometallics* **1996**, *15*, 1518-20.
- (5) Choudhary, N.; Hughes, D. L.; Kleinkes, U.; Larkworthy, L. F.; Leigh, G. J.; Maiwald, M.; Marmion, C. J.; Sanders, J. R.; Smith, G. W.; Sudbrake, C. *Polyhedron* **1997**, *16*, 1517-28.
- (6) Mayer, T. G.; Schmidt, R. R. *Eur. J. Org. Chem.* **1999**, *1999*, 1153-65.

**$^1\text{H}$  and  $^{13}\text{C}$  NMR spectra**

**(2,3,4,6-Tetra-*O*-acetyl- $\alpha$ -D-mannopyranosyl)-(1 $\rightarrow$ 3)-(2,4,6-tri-*O*-acetyl- $\alpha$ -D-mannopyranosyl) bromide (12)**

$^1\text{H}$  NMR

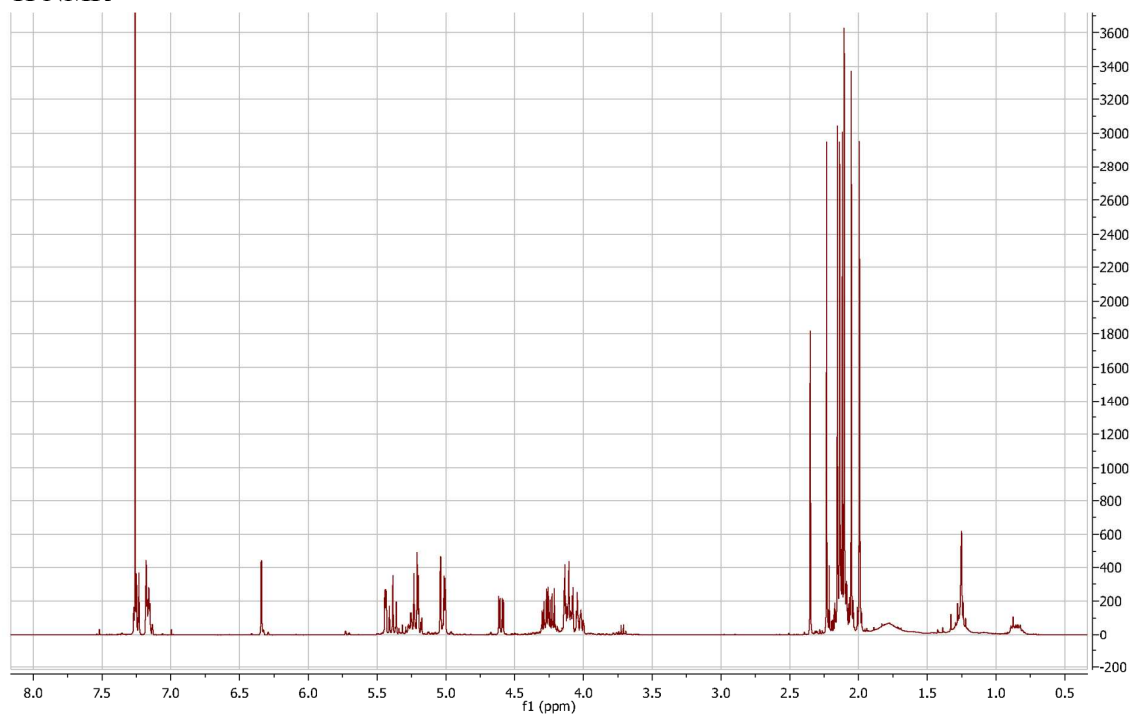

**2,3,4,6-Tetra-*O*-acetyl- $\alpha$ -D-mannopyranosyl-(1 $\rightarrow$ 3)-4,6-di-*O*-acetyl-1,5-anhydro-2-deoxy-D-arabino-hex-1-enitol (13)**

$^1\text{H}$  NMR

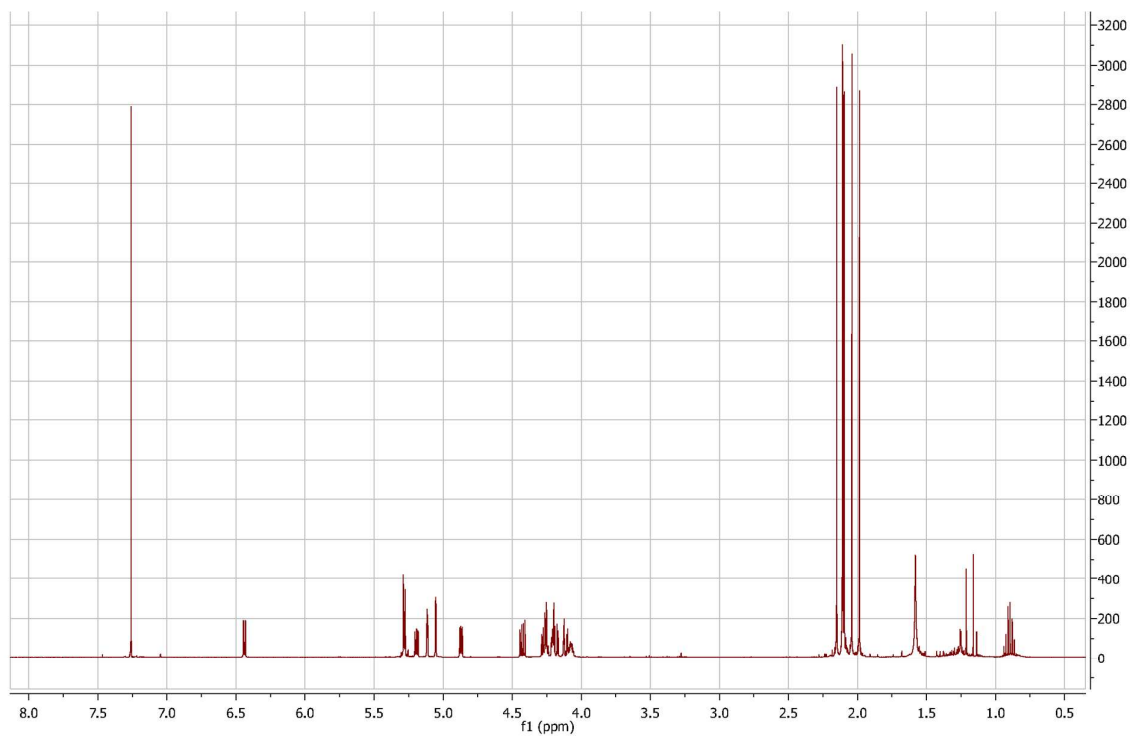

$^{13}\text{C}$  NMR

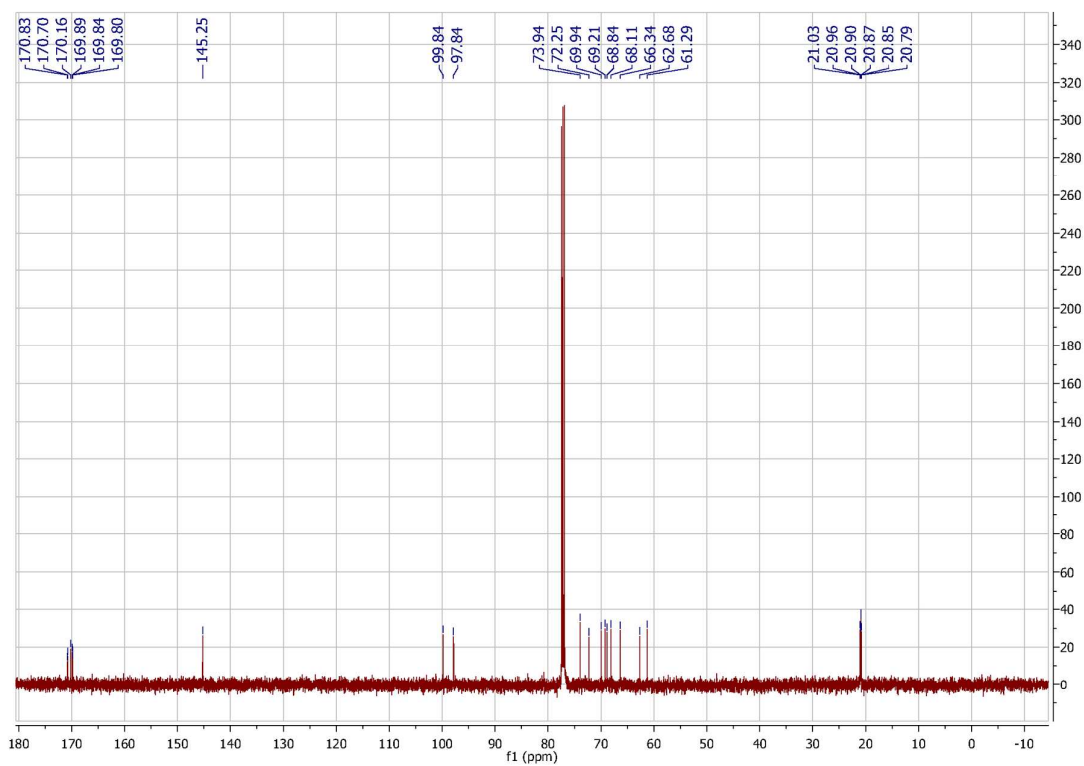



**2,3,4,6-Tetra-*O*-acetyl- $\alpha$ -D-mannopyranosyl-(1 $\rightarrow$ 3)-(4,6-di-*O*-acetyl-1,2-dideoxy-D-mannopyranose (14)**

$^1\text{H}$  NMR

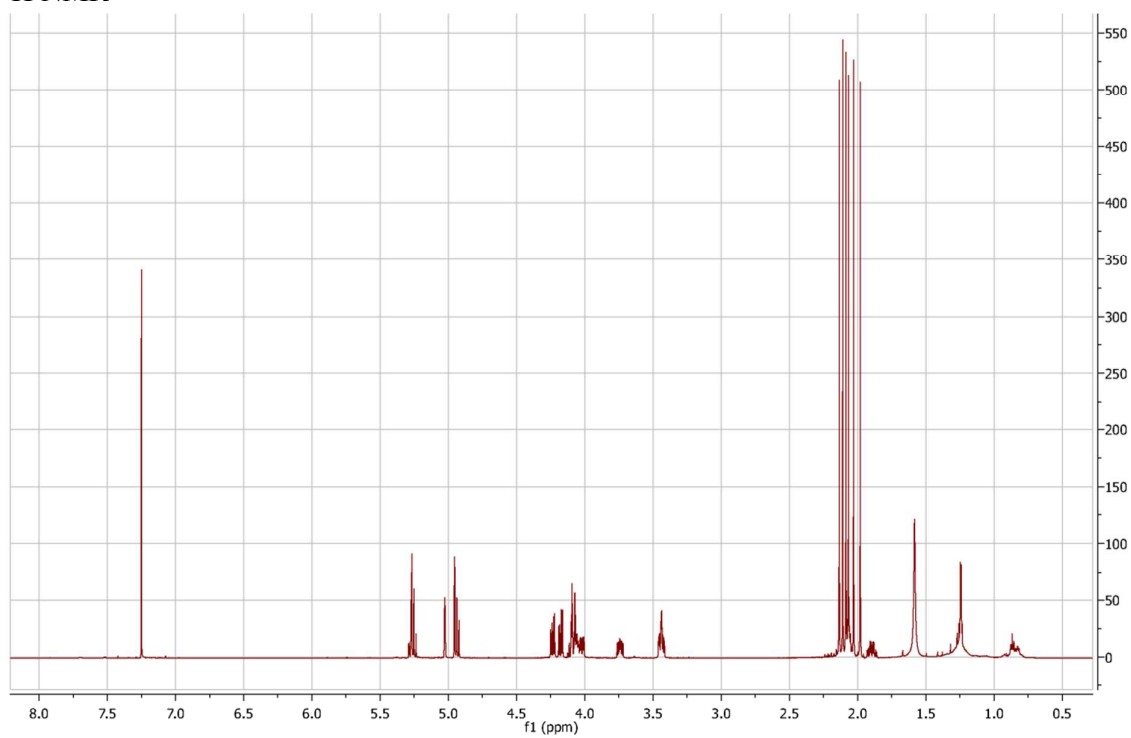

$^{13}\text{C}$  NMR

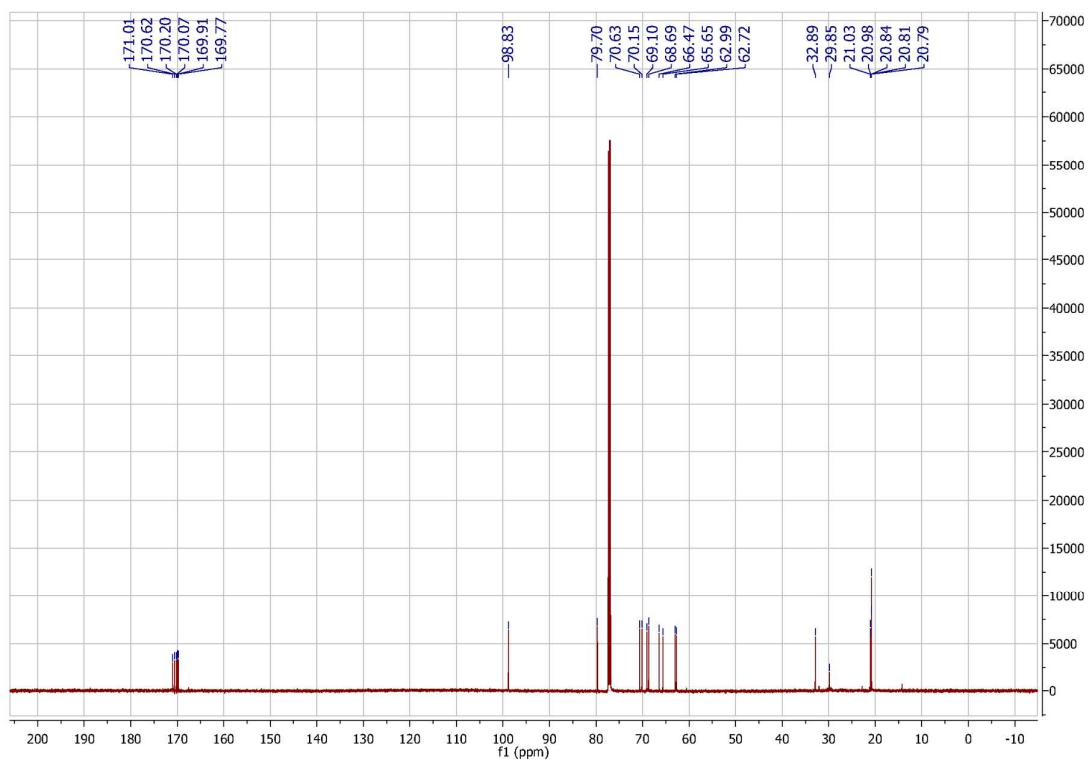

**$\alpha$ -D-Mannopyranosyl-(1 $\rightarrow$ 3)-1,2-dideoxy-D-mannopyranose (ManddMan; 5)**

$^1\text{H}$  NMR

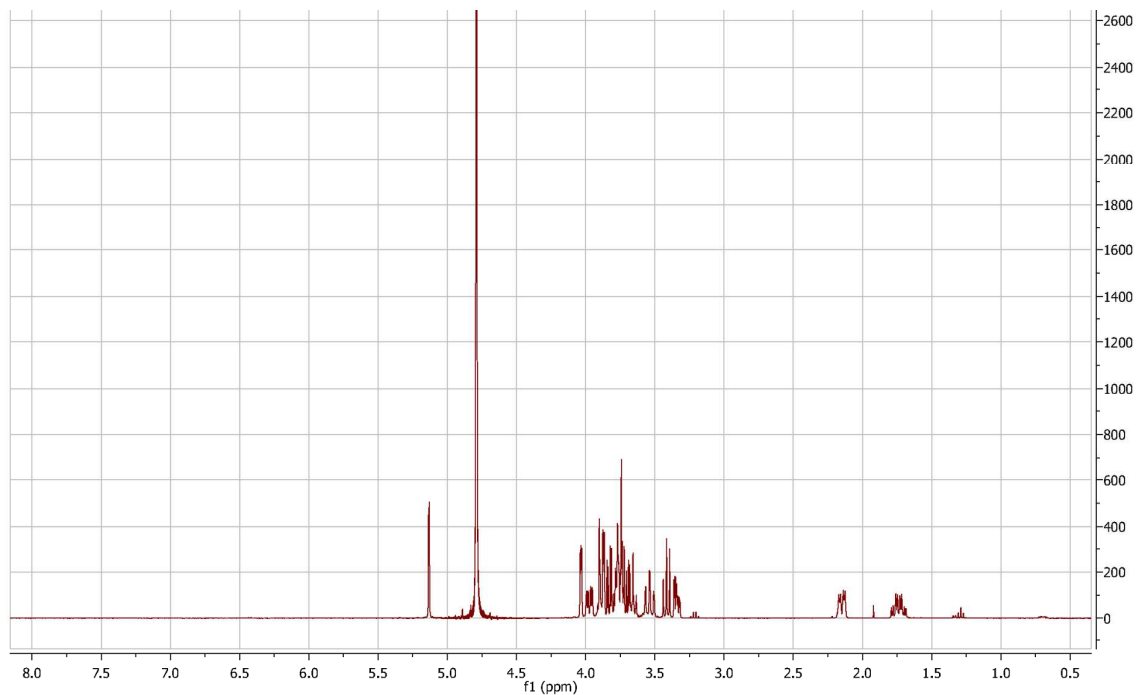

$^{13}\text{C}$  NMR

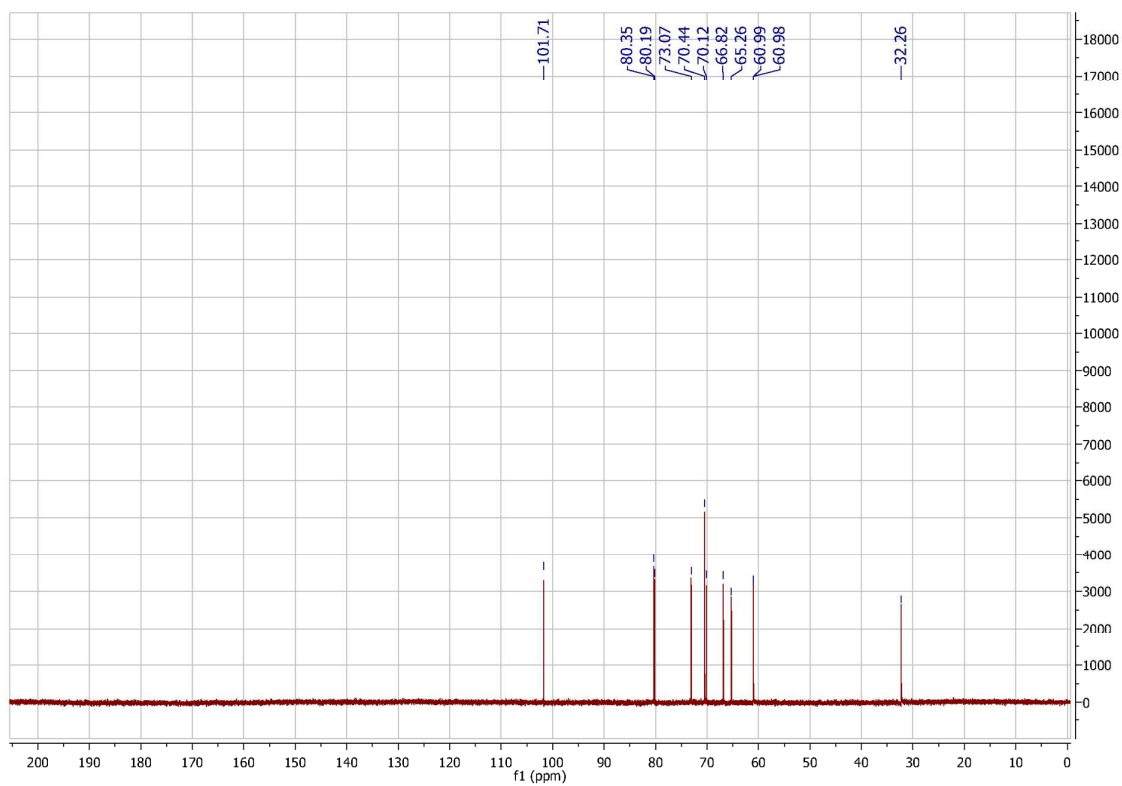

**$\alpha$ -D-Mannopyranosyl-(1 $\rightarrow$ 3)-1,5-anhydro-2-deoxy-D-arabino-hex-1-enitol (ManGlucal; 7)**

<sup>1</sup>H NMR

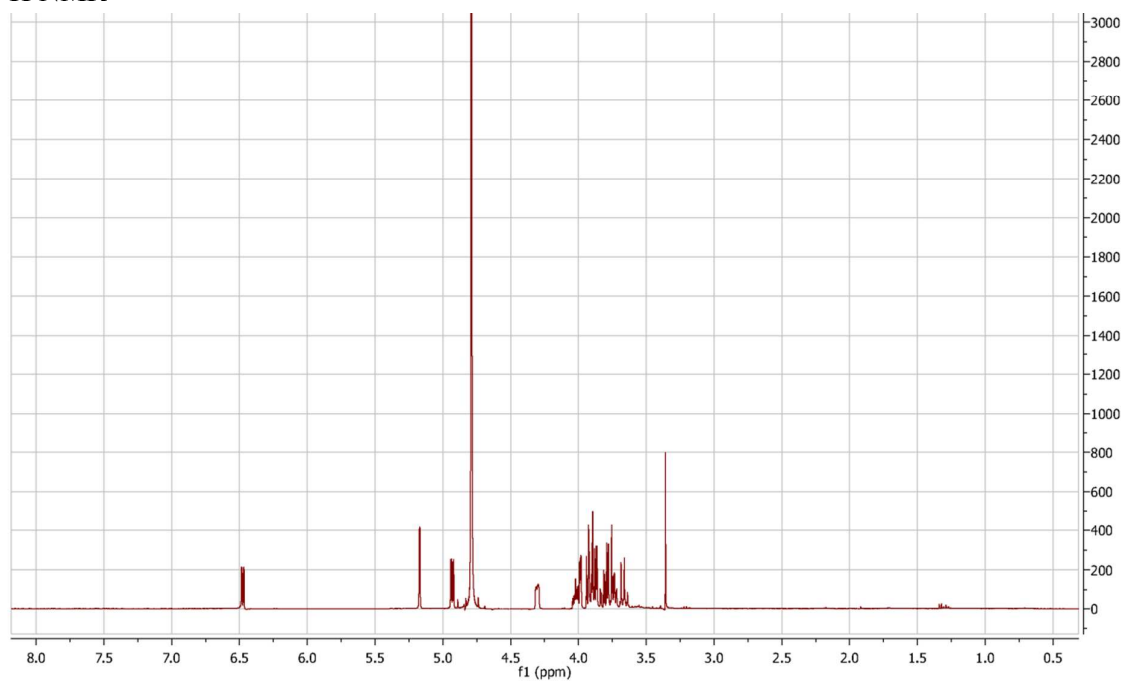

<sup>13</sup>C NMR

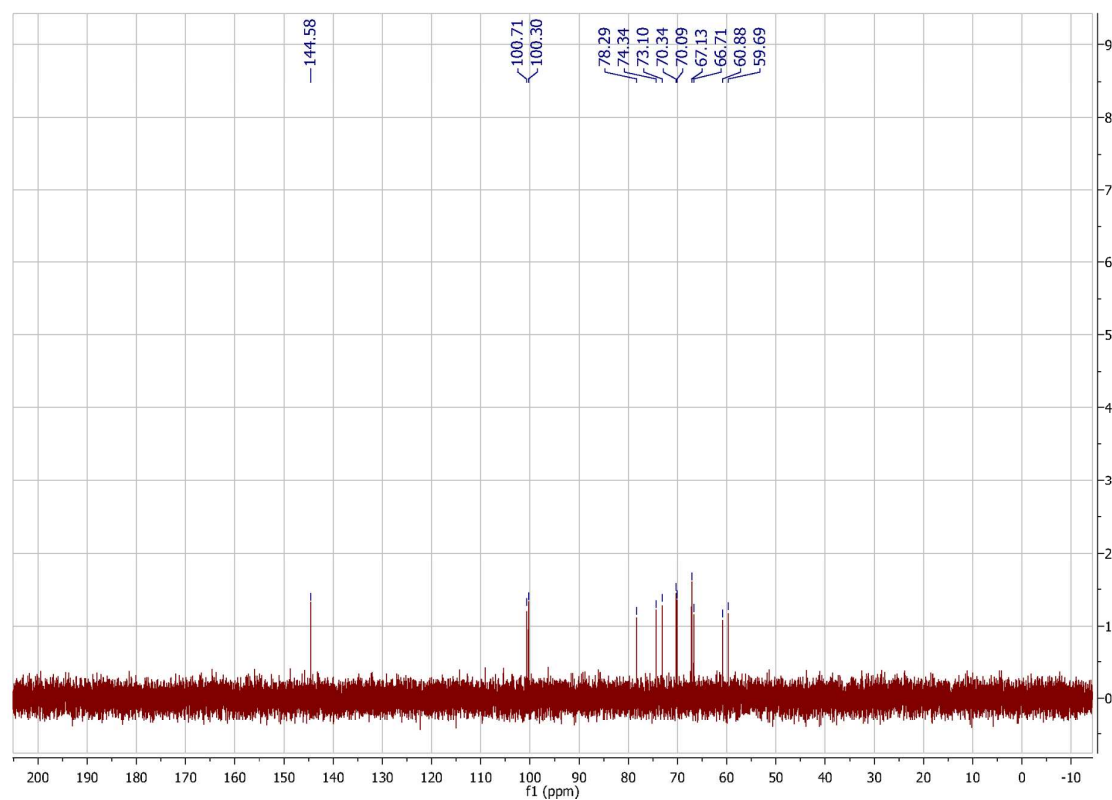

**Benzyl 2-O-(2-O-acetyl-3,4,5-tri-O-benzyl- $\alpha$ -mannopyranosyl)-(1 $\rightarrow$ 2)-(4-cyano-4-deoxy- $\beta$ -D-arabinopyranoside) (17)**

$^1\text{H}$  NMR

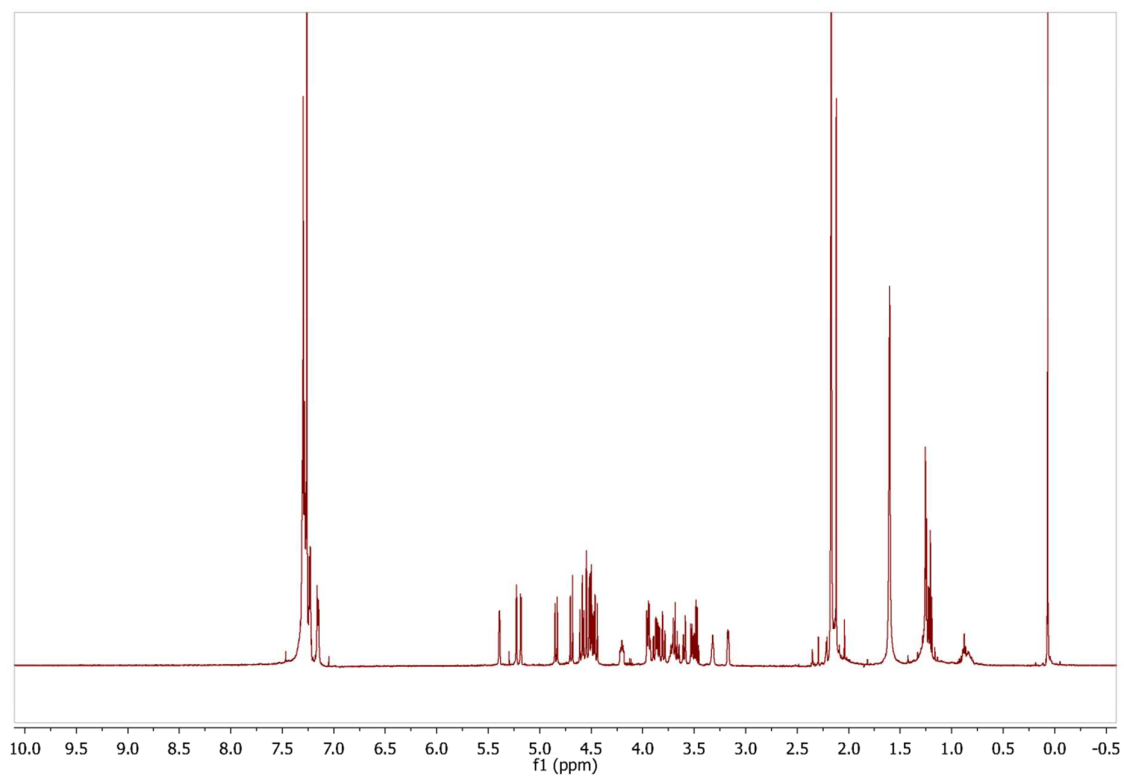

$^{13}\text{C}$  NMR

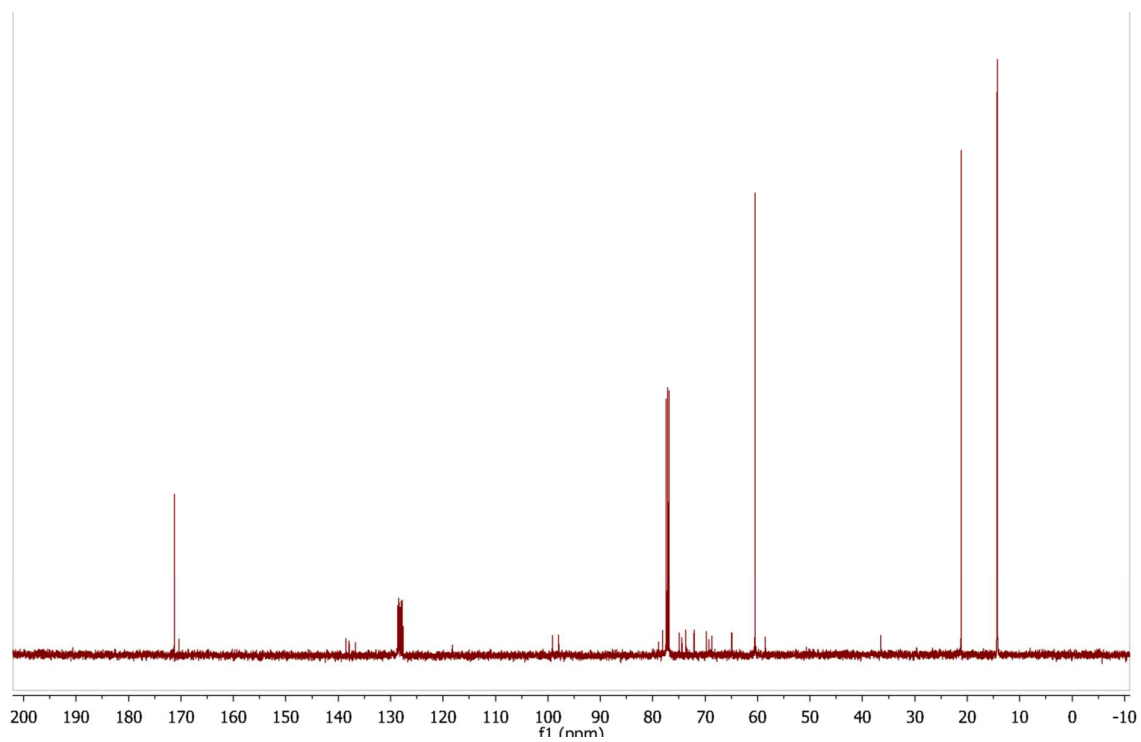

**Benzyl 2-O-(2-O-acetyl-3,4,5-tri-O-benzyl- $\alpha$ -mannopyranosyl)-(1 $\rightarrow$ 2)-(3-O-acetyl-4-cyano-4-deoxy- $\beta$ -D-arabinopyranoside)**

$^1\text{H}$  NMR

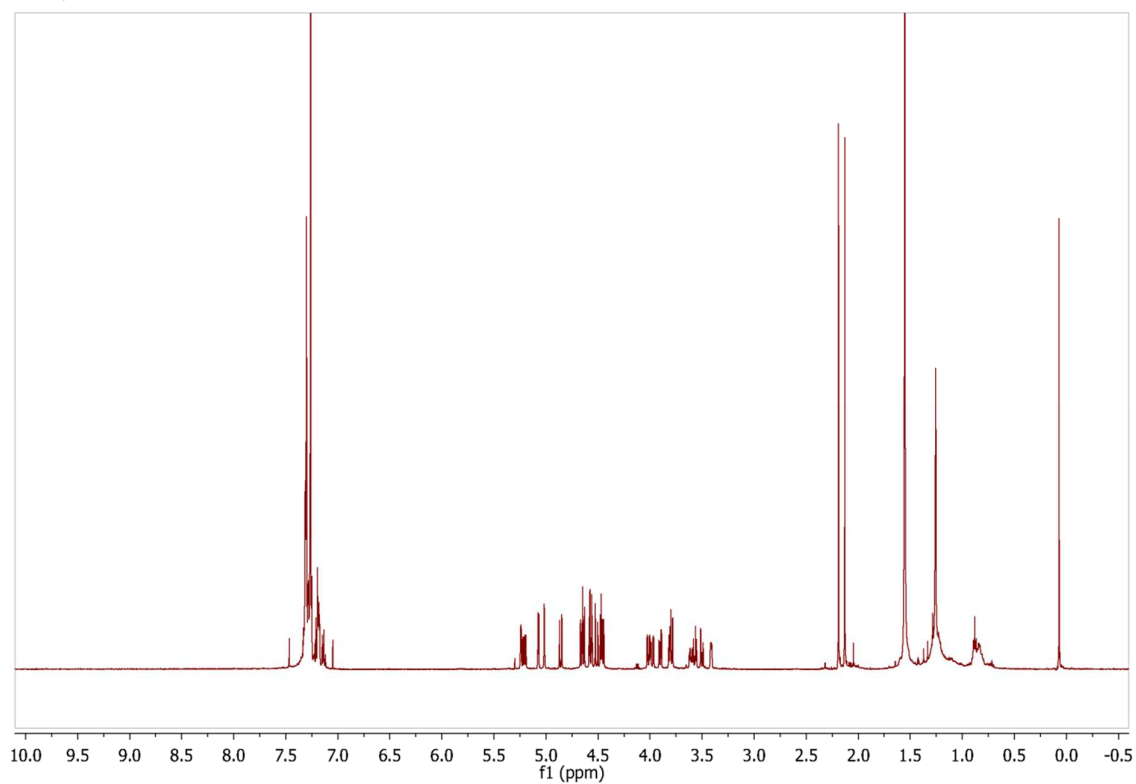

$^{13}\text{C}$  NMR

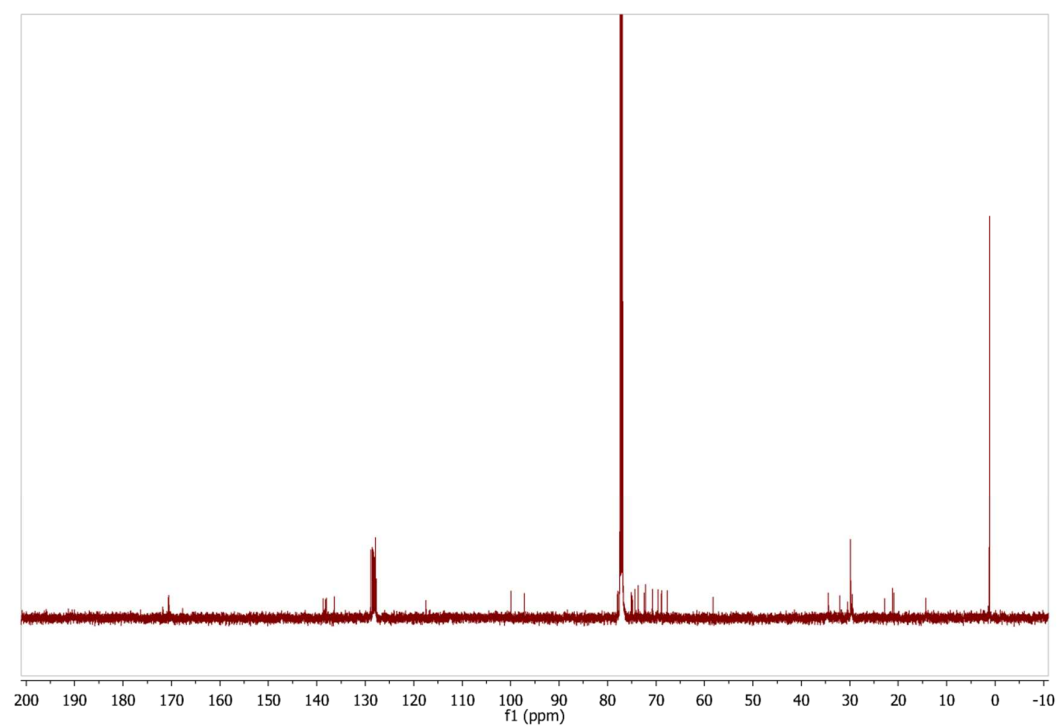

**Benzyl 2-*O*-(3,4,5-tri-*O*-benzyl- $\alpha$ -mannopyranosyl)-(1 $\rightarrow$ 2)-(4-cyano-4-deoxy- $\beta$ -D-arabinopyranoside) (18)**

$^1\text{H}$  NMR

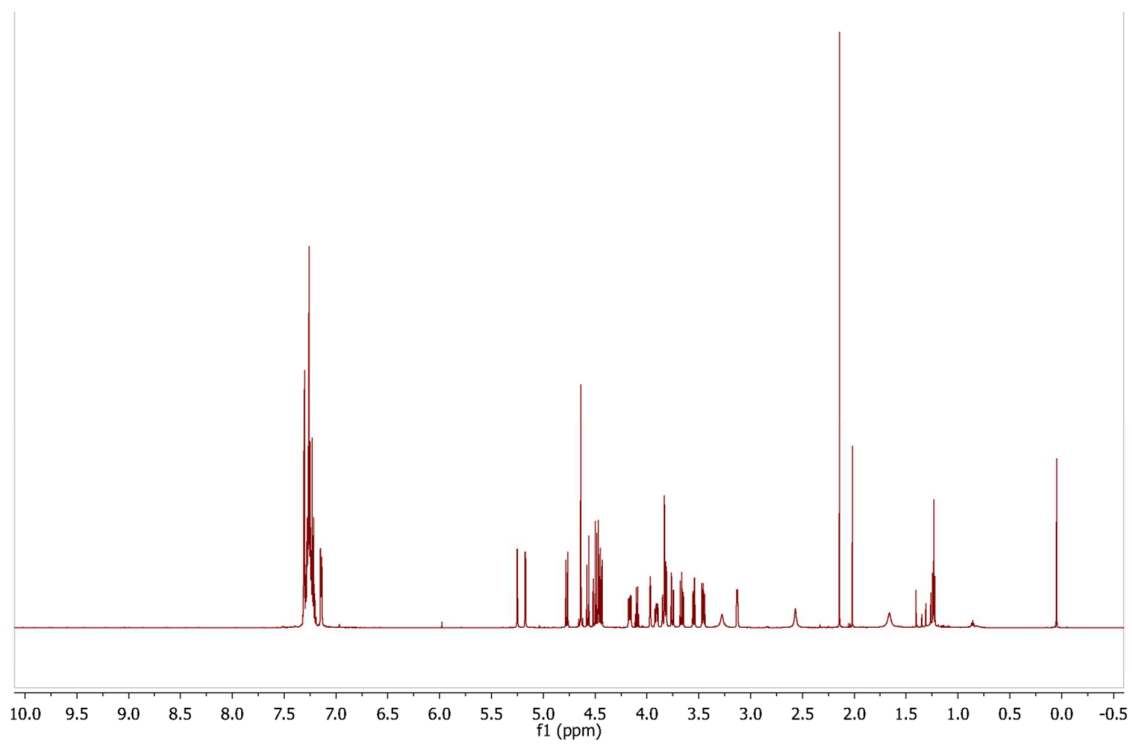

$^{13}\text{C}$  NMR

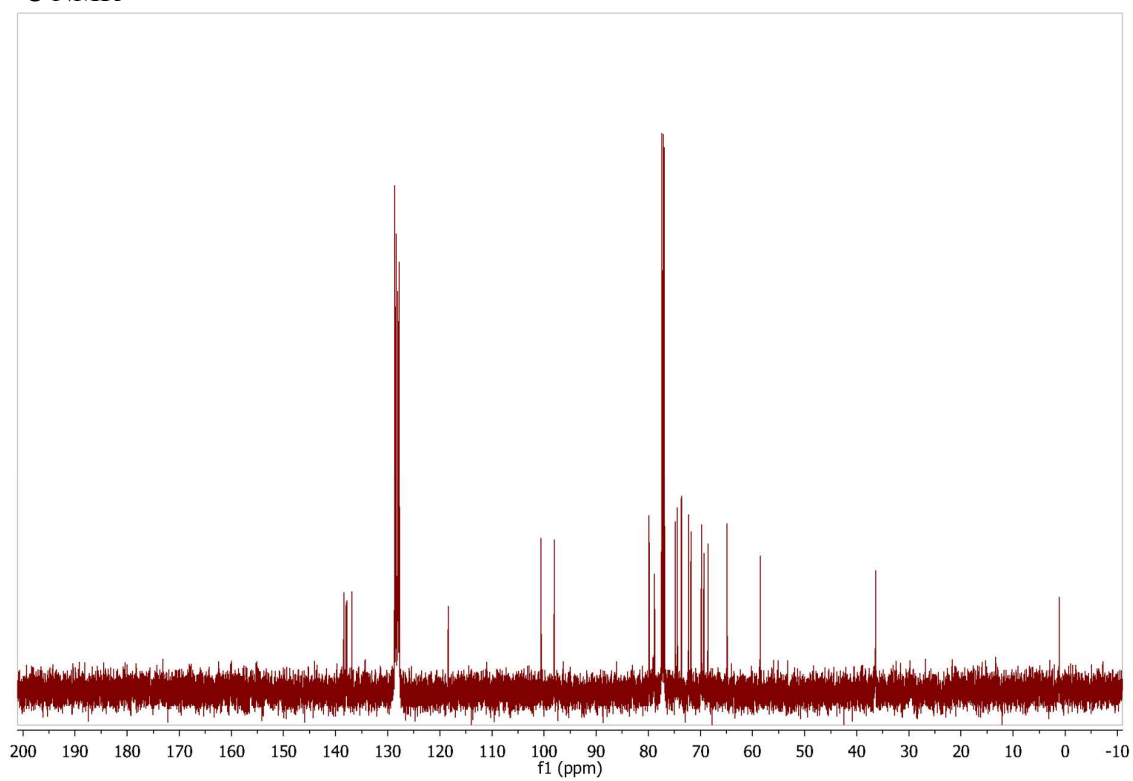

**Benzyl 2-O-(2-O-acetyl-2,4,5-tri-O-benzyl- $\alpha$ -mannopyranosyl)-(1 $\rightarrow$ 2)-(4-C-[(*tert*-butoxycarbonyl)amino]methyl-4-deoxy- $\beta$ -D-arabinopyranoside) (19)**

$^1\text{H}$  NMR

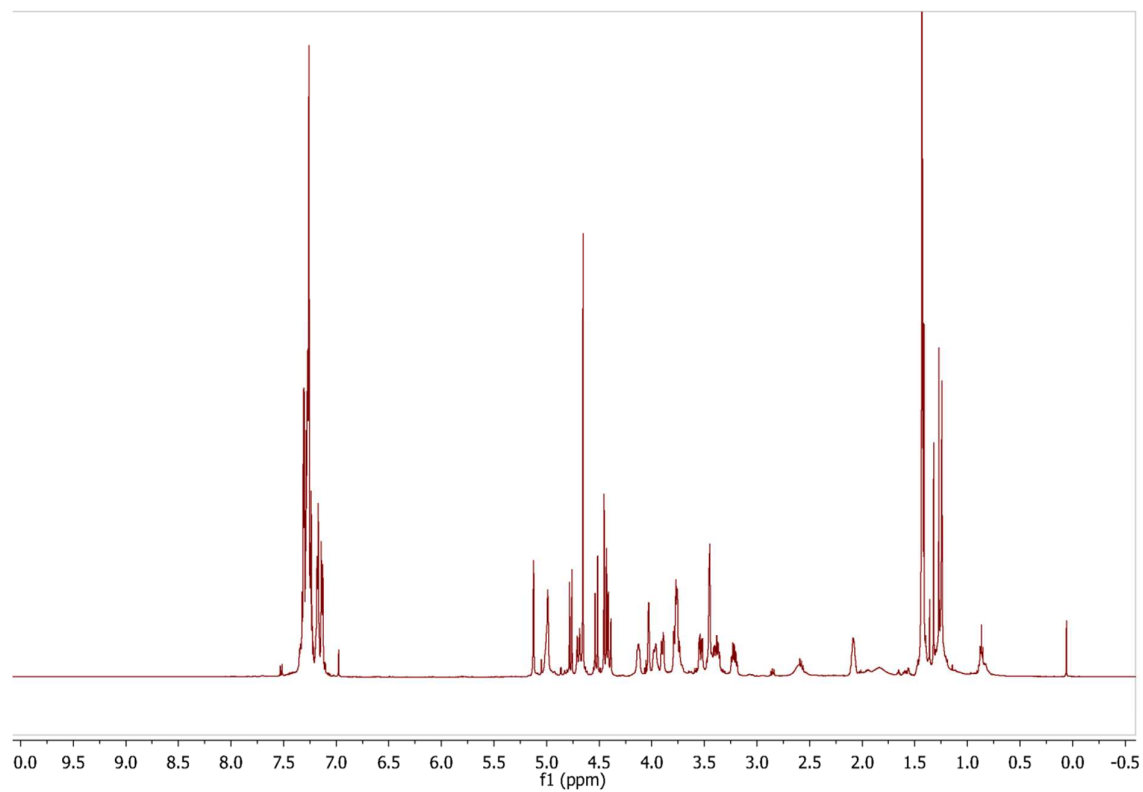

$^{13}\text{C}$  NMR

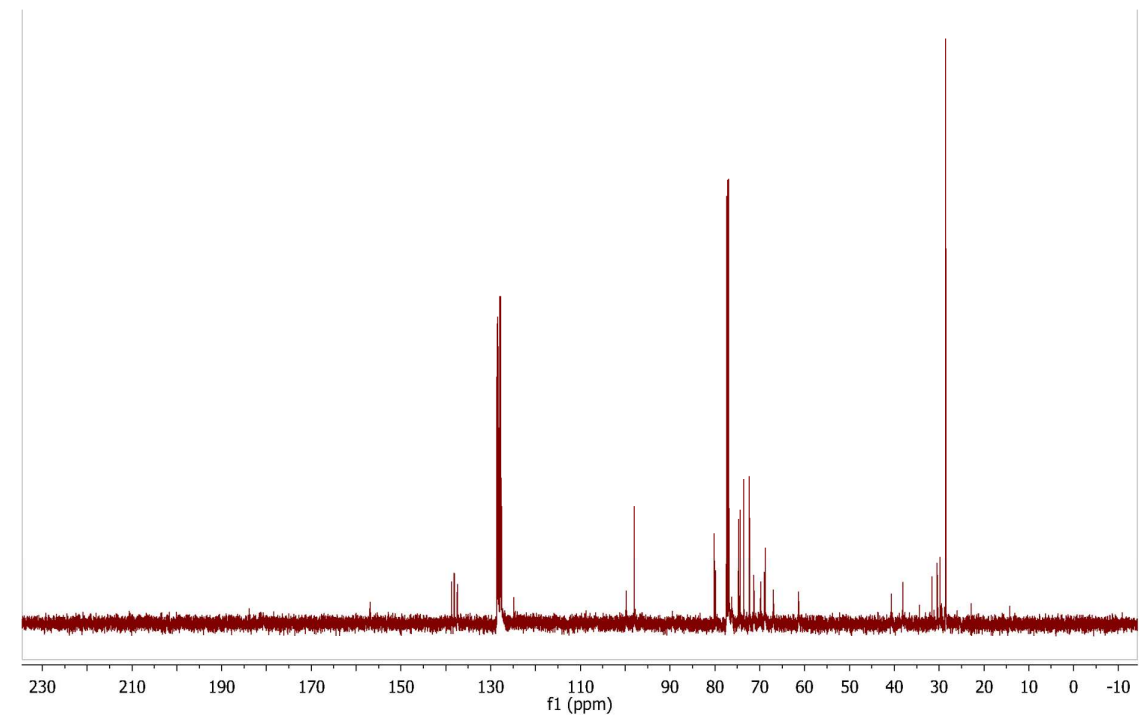

**$\alpha$ -D-Mannopyranosyl-(1 $\rightarrow$ 3)-noeuromycin hydrochloride (ManNOE.HCl; 9)**

$^1\text{H}$  NMR

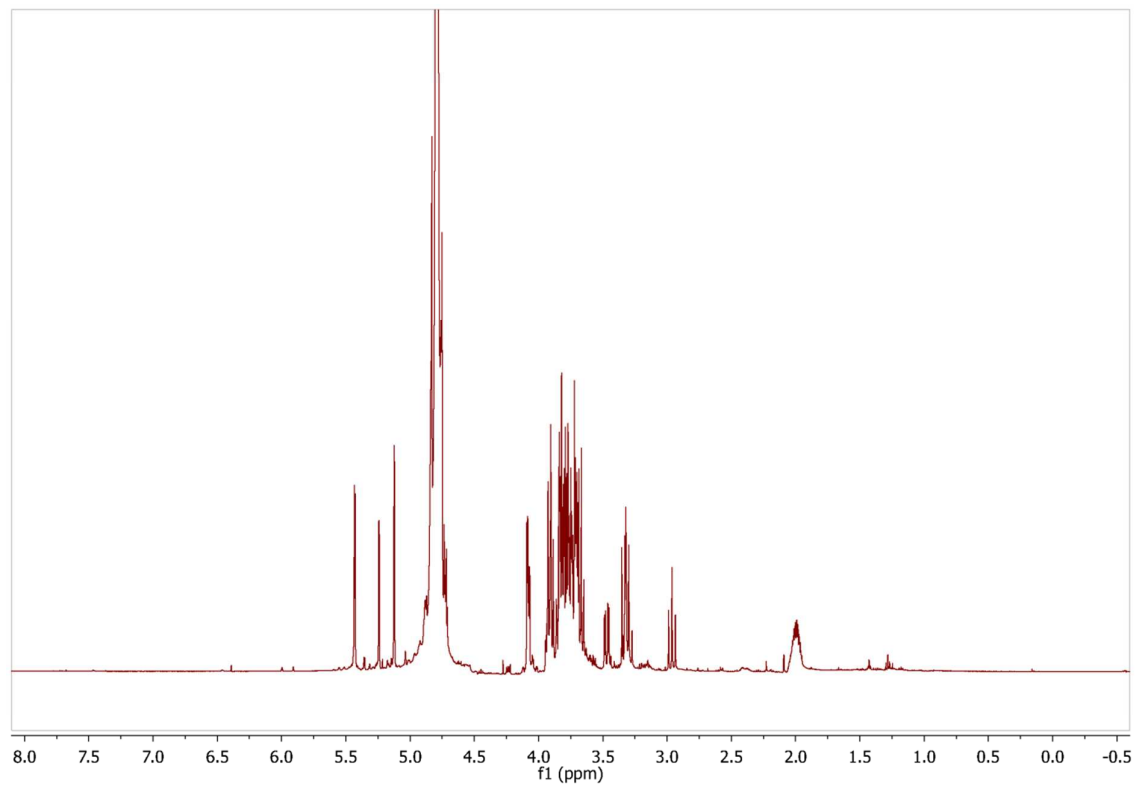

Supplement: ja6b10075_si_001.pdf [file ja6b10075_si_001.pdf]
